# Supplementary material for: Selective N–N or N–S bond cleavage of 1-trifluoromethyl benzotriazoles enables divergent synthesis of 1,2,4-benzotriazines and benzotriazoles
Source: Royal Society of Chemistry journal article supplement (doi:10.1039/d3qo00916e), 2023-01-01

## **Supporting Information**

# **Selective N-N or N-S bond cleavage of 1-trifluoromethyl benzotriazoles enables divergent synthesis of 1,2,4-benzotriazines and benzotriazoles**

Xinyuan Wang,<sup>a</sup> Yueyue Shan,<sup>a</sup> Hui Mao,<sup>a</sup> Xiao Xiao,<sup>c</sup> Nengzhong Wang,<sup>b\*</sup>  
Xin Lv,<sup>a\*</sup> and Liejin Zhou<sup>a\*</sup>

<sup>a</sup> Key Laboratory of the Ministry of Education for Advanced Catalysis Materials, Department of Chemistry,  
Zhejiang Normal University, 688 Yingbin Road, Jinhua 321004, P. R. China.

E-mail: [lvxin@zjnu.cn](mailto:lvxin@zjnu.cn), [ljzhou@zjnu.cn](mailto:ljzhou@zjnu.cn)

<sup>b</sup> Hubei Key Laboratory of Natural Products Research and Development, College of Biological and  
Pharmaceutical Sciences, China Three Gorges University, Yichang 443002, China; Email: [wangnz@ctgu.edu.cn](mailto:wangnz@ctgu.edu.cn)

<sup>c</sup> Institute of Pharmaceutical Science and Technology, Collaborative Innovation Center of Yangtze River Delta  
Region Green Pharmaceuticals, Zhejiang University of Technology, Hangzhou 310014, China.

## **Table of Contents**

|                                                                       |                |
|-----------------------------------------------------------------------|----------------|
| <b>1. General Information</b>                                         | <b>S2</b>      |
| <b>2. Optimization of reaction conditions for the synthesis of 5a</b> | <b>S3</b>      |
| <b>3. General procedure for the synthesis of products 3 and 5</b>     | <b>S4</b>      |
| <b>4. General procedure for the transformations of 3p</b>             | <b>S5</b>      |
| <b>5. Crystal structures of 5e</b>                                    | <b>S6-S7</b>   |
| <b>6. Characterization of Products</b>                                | <b>S8-S17</b>  |
| <b>7. Spectra of new compounds</b>                                    | <b>S18-S50</b> |

## 1. General Information

$^1\text{H}$  and  $^{13}\text{C}$  spectra were measured on a 600 MHz or 400 MHz NMR spectrometer using  $\text{CDCl}_3$  as the solvent with tetramethylsilane (TMS) as the internal standard. Chemical shifts ( $\delta$ ) are given in parts per million relatives to TMS, and the coupling constants are given in hertz. The following abbreviations were used to explain the multiplicities: s = singlet, d = doublet, t = triplet, q = quartet, m = multiplet, brs = broad singlet. High-resolution mass spectrometry (HRMS) analysis was carried out using a TOF MS instrument with an APCI or ESI, EI source. Single-crystal X-ray diffraction studies were conducted at 293 K on the Bruker D8 VENTURE diffractometer equipped with a PHOTON-II detector ( $\text{MoK}\alpha$ ,  $\lambda = 0.71073 \text{ \AA}$ ). An oil bath was used for heating when was needed. Column chromatography was performed using silica gel (200-300 mesh).

Commercially available materials purchased from Bidepharm and Energy Chemical were used as received. Unless otherwise specified, all reactions were carried out under nitrogen atmosphere in 10 mL Schlenk tubes. Benzotriazole were prepared according to previous literature procedures.

## 2. Optimization of reaction conditions for the synthesis of **5a**

The results of the optimization of reaction conditions for the synthesis of **5a** are shown in Table S1. Different solvents were studied for the transformation mediated by LiOH (entries 1-5), and the reaction in DMF was found to be more effective than others (entry 3). Then different bases were also screened. The yield of **5a** was decreased when KOH, DBU or *t*-BuOK was utilized (entries 6-8). However, the use of Cs<sub>2</sub>CO<sub>3</sub> afforded a better result (entry 9). Further investigation indicated that 1,4-dioxane was the most suitable solvent for the reaction mediated by Cs<sub>2</sub>CO<sub>3</sub> (entry 14 vs entries 9-13). Therefore, the optimal reaction conditions for the synthesis of **5a** was established as following: using Cs<sub>2</sub>CO<sub>3</sub> (2.0 eq) as the base and 1,4-dioxane as the solvent, and being stirred at room temperature.

**Table S1** Optimization of reaction conditions for the synthesis of **5a** <sup>a</sup>

Cc1ccccc1n2nnc2C(F)(F)F (**1a**) + CCOC(=O)CBr (**4a** (2.0 eq.))  $\xrightarrow[\text{Solvent, rt}]{\text{Base (2.0 eq.)}}$  CCOC(=O)Cc1ccccc1n2nnc2 (**5a**)

| Entry     | Base                                | Solvent            | Yield of <b>5a</b> (%) <sup>b</sup> |
|-----------|-------------------------------------|--------------------|-------------------------------------|
| 1         | LiOH                                | THF                | 40                                  |
| 2         | LiOH                                | 1,4-dioxane        | 46                                  |
| 3         | LiOH                                | DMF                | 53                                  |
| 4         | LiOH                                | MeCN               | 32                                  |
| 5         | LiOH                                | PhCl               | trace                               |
| 6         | KOH                                 | DMF                | 27                                  |
| 7         | DBU                                 | DMF                | nd <sup>c</sup>                     |
| 8         | <i>t</i> -BuOK                      | DMF                | 35                                  |
| 9         | Cs <sub>2</sub> CO <sub>3</sub>     | DMF                | 61                                  |
| 10        | Cs <sub>2</sub> CO <sub>3</sub>     | DCE                | 68                                  |
| 11        | Cs <sub>2</sub> CO <sub>3</sub>     | Acetone            | 27                                  |
| 12        | Cs <sub>2</sub> CO <sub>3</sub>     | THF                | 52                                  |
| 13        | Cs <sub>2</sub> CO <sub>3</sub>     | Toluene            | 76                                  |
| <b>14</b> | <b>Cs<sub>2</sub>CO<sub>3</sub></b> | <b>1,4-dioxane</b> | <b>80</b> <sup>d</sup>              |

<sup>a</sup> Reaction conditions: a mixture of 1-Tf-substituted benzotriazole **1a** (0.20 mmol),  $\alpha$ -bromoacetophenone **4a** (0.40 mmol, 2 equiv), and base (0.40 mmol, 2 equiv) was stirred at rt under air atmosphere for about 6 h (monitored by TLC). <sup>b</sup> Yields of the products approximately determined by the crude <sup>1</sup>H NMR spectra. <sup>c</sup> nd = no desired product was detected. <sup>d</sup> Yields of isolated products.

### 3. General procedure for the synthesis of products 3 and 5

#### 3.1 General procedure for the synthesis of products 3

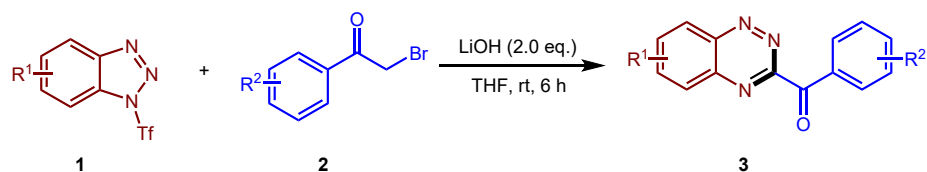

Under nitrogen atmosphere, in a dry Schlenk tube, benzotriazole **1** (0.20 mmol) was added to tetrahydrofuran (2.0 mL) and stirred at room temperature. Then, bromide **2** (0.4 mmol) and LiOH (9.6 mg, 0.4 mmol) were added in sequence. The mixture was stirred for 6 h at room temperature. When the reaction was completed (monitored by TLC). The mixture was directly concentrated under reduced pressure. The resulting crude residue was purified via column chromatography on silica gel (petroleum ether/ethyl acetate = 5:1 to 20:1) to afford the desired product **3** in good yields.

#### 3.2 General procedure for the synthesis of products 5

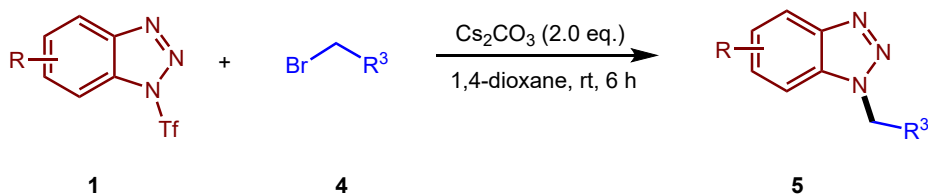

In a dry Schlenk tube, benzotriazole **1** (0.20 mmol) was added to 1,4-dioxane (2.0 mL) and stirred at room temperature. Then, bromide **4** (0.4 mmol) and Cs<sub>2</sub>CO<sub>3</sub> (130.33mg, 0.4 mmol) were added in sequence. The mixture was stirred 6 h at room temperature. When the reaction was completed (monitored by TLC). The mixture was directly concentrated under reduced pressure. The resulting crude residue was purified via column chromatography on silica gel (petroleum ether/ethyl acetate = 5:1 to 20:1) to afford the desired product **5** in good yields.

#### 4. General procedure for the transformations of **3p**

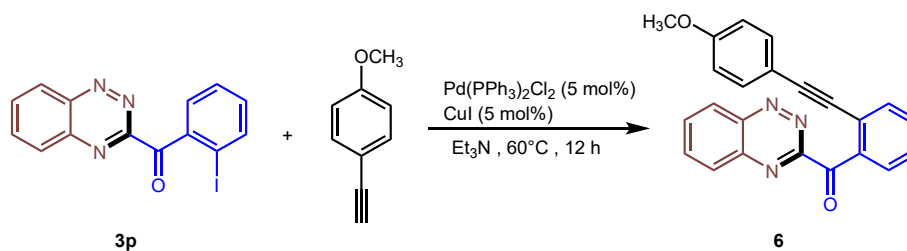

Under nitrogen atmosphere, in a dry Schlenk tube with a magnetic stir bar, was added **3p** (72.2 mg, 0.20 mmol) and the reaction solvent  $\text{Et}_3\text{N}$  (2.0 mL) were added, followed by  $\text{Pd}(\text{PPh}_3)_2\text{Cl}_2$  (7.0 mg, 0.01 mmol) and  $\text{CuI}$  (1.9 mg, 0.01 mmol), 10 min later by *p*-methoxyphenylacetylene (29.07 mg, 0.22 mmol) and the reaction mixture was stirred at  $60^\circ\text{C}$  for 12 h until the **3p** was complete consumed (monitored by TLC). The reaction was quenched with  $\text{HCl}$  (1.0 M, pH = 6-7), and extracted with EA (10 mL $\times$ 3). The organic extracts were combined and dried over  $\text{Na}_2\text{SO}_4$  and concentrated under reduced pressure. The resulting crude residue was purified via column chromatography on silica gel (petroleum ether/ethyl acetate = 5:1) to afford the desired product **6** with 90% (65.7 mg) yield.

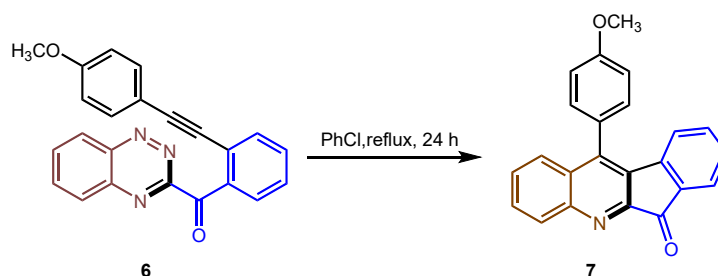

Under nitrogen atmosphere, in a dry Schlenk tube with a magnetic stir bar, was added **6** (73.0 mg, 0.20 mmol) and the reaction solvent  $\text{PhCl}$  (2.0 mL) were added, the reaction mixture was stirred at  $160^\circ\text{C}$  for 24 h until the **6** was complete consumed (monitored by TLC). The system was cooled to room temperature and the solvent was spin-dried over the column (petroleum ether/ethyl acetate = 8:1) to afford the desired product **7** with 75% (50.6 mg) yield.

## 5. Crystal structures of **5e**

Product **5e** was crystallized as a yellow crystal via vaporization of a petroleum ether/ethyl acetate solution, and its absolute configuration was determined by x-ray structure analysis. The CCDC number was 2241694. The supplementary crystallographic data that could be obtained free of charge from The Cambridge Crystallographic Data Centre via [www.ccdc.cam.ac.uk/data\\_request/cif](http://www.ccdc.cam.ac.uk/data_request/cif).

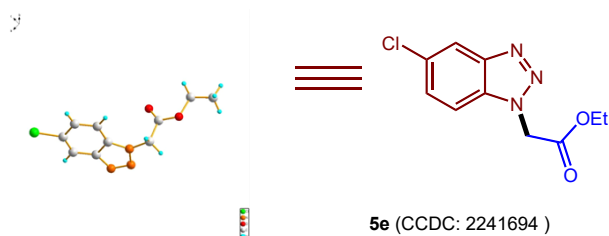

## Crystal data and structure refinement for 5e.

|                                               |                                                               |
|-----------------------------------------------|---------------------------------------------------------------|
| CCDC Number                                   | 2241694                                                       |
| Identification code                           | <b>5e</b>                                                     |
| Empirical formula                             | $C_{10}H_{10}ClN_3O_2$                                        |
| Formula weight                                | 239.66                                                        |
| Temperature/K                                 | 298.00                                                        |
| Crystal system                                | monoclinic                                                    |
| Space group                                   | $C2/c$                                                        |
| $a/\text{\AA}$                                | 21.347(2)                                                     |
| $b/\text{\AA}$                                | 11.8842(11)                                                   |
| $c/\text{\AA}$                                | 9.4684(9)                                                     |
| $\alpha/^\circ$                               | 90                                                            |
| $\beta/^\circ$                                | 111.351(3)                                                    |
| $\gamma/^\circ$                               | 90                                                            |
| Volume/ $\text{\AA}^3$                        | 2237.2(4)                                                     |
| Z                                             | 8                                                             |
| $\rho_{\text{calc}}/\text{cm}^3$              | 1.423                                                         |
| $\mu/\text{mm}^{-1}$                          | 0.330                                                         |
| F(000)                                        | 992.0                                                         |
| Crystal size/ $\text{mm}^3$                   | $0.19 \times 0.178 \times 0.154$                              |
| Radiation                                     | $\text{MoK}\alpha$ ( $\lambda = 0.71073$ )                    |
| $2\Theta$ range for data collection/ $^\circ$ | 6.648 to 50.742                                               |
| Index ranges                                  | $-25 \leq h \leq 25, -14 \leq k \leq 14, -11 \leq l \leq 11$  |
| Reflections collected                         | 9082                                                          |
| Independent reflections                       | 2050 [ $R_{\text{int}} = 0.0395, R_{\text{sigma}} = 0.0306$ ] |
| Data/restraints/parameters                    | 2050/0/146                                                    |
| Goodness-of-fit on $F^2$                      | 1.029                                                         |
| Final R indexes [ $I \geq 2\sigma(I)$ ]       | $R_1 = 0.0545, wR_2 = 0.1320$                                 |
| Final R indexes [all data]                    | $R_1 = 0.0744, wR_2 = 0.1481$                                 |
| Largest diff. peak/hole / $e \text{\AA}^{-3}$ | 0.37/-0.27                                                    |

## 6. Characterization of Products

### Benzo[*e*][1,2,4]triazin-3-yl(phenyl)methanone (3a)

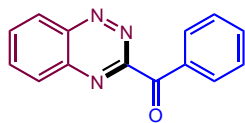

Isolated in 78% yield (36.7 mg) as yellow solid.

$^1\text{H}$  NMR (400 MHz,  $\text{CDCl}_3$ )  $\delta$  8.66 (dd,  $J = 8.4, 0.8$  Hz, 1H), 8.26 – 8.19 (m, 1H), 8.14 – 8.08 (m, 3H), 8.06 – 8.01 (m, 1H), 7.69 – 7.63 (m, 1H), 7.55 – 7.48 (m, 2H).  $^{13}\text{C}$  NMR (101 MHz,  $\text{CDCl}_3$ )  $\delta$  190.55, 158.10, 147.60, 140.33, 136.65, 135.16, 134.24, 132.73, 131.23, 129.80, 129.68, 128.69. HRMS (ESI) calcd. for  $\text{C}_{14}\text{H}_{10}\text{N}_3\text{O}$  [ $\text{M}+\text{H}^+$ ]: 236.0810, found: 236.0819.

### (8-Methylbenzo[*e*][1,2,4]triazin-3-yl)(phenyl)methanone (3b)

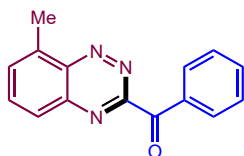

Isolated in 67% yield (33.4 mg) as yellow solid.

$^1\text{H}$  NMR (400 MHz,  $\text{CDCl}_3$ )  $\delta$  8.19 – 8.13 (m, 2H), 8.08 (d,  $J = 8.5$  Hz, 1H), 8.03 – 7.97 (m, 1H), 7.85 – 7.81 (m, 1H), 7.71 – 7.64 (m, 1H), 7.57 – 7.51 (m, 2H), 3.11 (s, 3H).  $^{13}\text{C}$  NMR (101 MHz,  $\text{CDCl}_3$ )  $\delta$  190.80, 158.00, 146.89, 140.97, 139.40, 136.79, 135.39, 134.13, 132.45, 131.32, 128.60, 127.40, 17.02. HRMS (ESI) calcd. for  $\text{C}_{15}\text{H}_{12}\text{N}_3\text{O}$  [ $\text{M}+\text{H}^+$ ]: 250.0975, found: 250.0976.

### (8-Fluorobenzo[*e*][1,2,4]triazin-3-yl)(phenyl)methanone (3c)

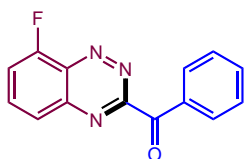

Isolated in 65% yield (32.9 mg) as yellow solid.

$^1\text{H}$  NMR (600 MHz,  $\text{CDCl}_3$ )  $\delta$  8.15 – 8.05 (m, 4H), 7.74 – 7.66 (m, 2H), 7.60 – 7.50 (m, 2H).  $^{13}\text{C}$  NMR (151 MHz,  $\text{CDCl}_3$ )  $\delta$  190.08 (s), 158.56 (s), 157.74 (d,  $J = 270.2$  Hz), 141.04 (s), 139.23 (d,  $J = 12.5$  Hz), 136.68 (d,  $J = 8.4$  Hz), 134.95 (s), 134.47 (s), 131.25 (s), 128.79 (s), 125.66 (d,  $J = 5.2$  Hz), 116.45 (d,  $J = 17.7$  Hz). HRMS (ESI) calcd. for  $\text{C}_{14}\text{H}_9\text{FN}_3\text{O}$  [ $\text{M}+\text{H}^+$ ]: 254.0724, found: 254.0724.

### (7-Chlorobenzo[*e*][1,2,4]triazin-3-yl)(phenyl)methanone (3d)

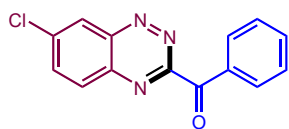

Isolated in 67% yield (36.1 mg) as yellow solid.

$^1\text{H}$  NMR (400 MHz,  $\text{CDCl}_3$ )  $\delta$  8.68 (d,  $J$  = 1.9 Hz, 1H), 8.22 (d,  $J$  = 9.0 Hz, 1H), 8.12 (d,  $J$  = 7.5 Hz, 2H), 8.05 (dd,  $J$  = 9.0, 2.1 Hz, 1H), 7.72 – 7.65 (m, 1H), 7.58 – 7.52 (m, 2H).  $^{13}\text{C}$  NMR (101 MHz,  $\text{CDCl}_3$ )  $\delta$  190.17, 158.19, 147.52, 139.12, 138.98, 137.97, 135.08, 134.41, 131.27, 128.79, 128.41 (1 peak is missing). HRMS (ESI) calcd. for  $\text{C}_{14}\text{H}_9\text{ClN}_3\text{O}$  [ $\text{M}+\text{H}^+$ ]: 270.0429, found: 270.0431.

**(6-Methylbenzo[e][1,2,4]triazin-3-yl)(phenyl)methanone (3e)**

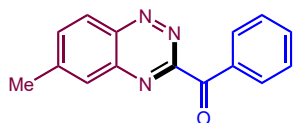

Isolated in 69% yield (34.4 mg) as yellow solid.

$^1\text{H}$  NMR (600 MHz,  $\text{CDCl}_3$ )  $\delta$  8.53 (d,  $J$  = 8.6 Hz, 1H), 8.12 (d,  $J$  = 7.6 Hz, 2H), 7.98 (s, 1H), 7.86 (d,  $J$  = 8.5 Hz, 1H), 7.71 – 7.63 (m, 1H), 7.58 – 7.49 (m, 2H), 2.70 (s, 3H).  $^{13}\text{C}$  NMR (151 MHz,  $\text{CDCl}_3$ )  $\delta$  190.71, 158.29, 148.63, 146.62, 140.69, 135.31, 135.29, 134.13, 131.22, 129.26, 128.63, 127.86, 22.79. HRMS (ESI) calcd. for  $\text{C}_{15}\text{H}_{12}\text{N}_3\text{O}$  [ $\text{M}+\text{H}^+$ ]: 250.0975, found: 250.0976.

**(6-Fluorobenzo[e][1,2,4]triazin-3-yl)(phenyl)methanone (3f)**

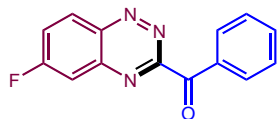

Isolated in 78% yield (39.5 mg) as yellow solid.

$^1\text{H}$  NMR (600 MHz,  $\text{CDCl}_3$ )  $\delta$  8.74 – 8.68 (m, 1H), 8.12 – 8.07 (m, 2H), 7.84 – 7.79 (m, 2H), 7.70 – 7.65 (m, 1H), 7.55 – 7.51 (m, 2H).  $^{13}\text{C}$  NMR (151 MHz,  $\text{CDCl}_3$ )  $\delta$  190.27, 166.64 (d,  $J$  = 264.1 Hz), 158.39, 145.61, 142.28 (d,  $J$  = 14.8 Hz), 135.01, 134.41, 132.96 (d,  $J$  = 10.9 Hz), 131.22, 128.77, 124.19 (d,  $J$  = 27.3 Hz), 112.82 (d,  $J$  = 21.9 Hz). HRMS (ESI) calcd. for  $\text{C}_{14}\text{H}_9\text{FN}_3\text{O}$  [ $\text{M}+\text{H}^+$ ]: 254.0724, found: 254.0726.

**(6-Chlorobenzo[e][1,2,4]triazin-3-yl)(phenyl)methanone (3g)**

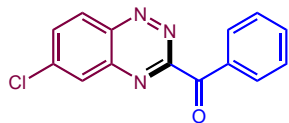

Isolated in 58% yield (31.2 mg) as yellow solid.

$^1\text{H}$  NMR (400 MHz,  $\text{CDCl}_3$ )  $\delta$  8.63 (d,  $J = 9.0$  Hz, 1H), 8.23 (d,  $J = 2.0$  Hz, 1H), 8.14 – 8.06 (m, 2H), 7.97 (dd,  $J = 9.0, 2.1$  Hz, 1H), 7.73 – 7.65 (m, 1H), 7.59 – 7.48 (m, 2H).  $^{13}\text{C}$  NMR (151 MHz,  $\text{CDCl}_3$ )  $\delta$  190.20, 158.56, 146.26, 143.37, 140.86, 134.99, 134.45, 134.19, 131.24, 131.19, 128.80, 128.40. HRMS (ESI) calcd. for  $\text{C}_{14}\text{H}_9\text{ClN}_3\text{O}$   $[\text{M}+\text{H}^+]$ : 270.0429, found: 270.0431.

**(6,7-Dimethylbenzo[*e*][1,2,4]triazin-3-yl)(phenyl)methanone (3h)**

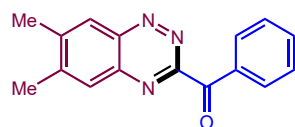

Isolated in 63% yield (33.2 mg) as yellow solid.

$^1\text{H}$  NMR (400 MHz,  $\text{CDCl}_3$ )  $\delta$  8.36 (s, 1H), 8.12 (dd,  $J = 8.4, 1.2$  Hz, 2H), 7.95 (s, 1H), 7.69 – 7.62 (m, 1H), 7.53–7.50 (m, 2H), 2.61 (s, 3H), 2.59 (s, 3H).  $^{13}\text{C}$  NMR (101 MHz,  $\text{CDCl}_3$ )  $\delta$  190.80, 157.80, 148.92, 146.91, 144.35, 139.63, 135.37, 133.94, 131.19, 128.51, 128.07, 128.01, 21.23, 20.80. HRMS (ESI) calcd. for  $\text{C}_{16}\text{H}_{14}\text{N}_3\text{O}$   $[\text{M}+\text{H}^+]$ : 264.1131, found: 264.1131.

**(6,7-Difluorobenzo[*e*][1,2,4]triazin-3-yl)(phenyl)methanone (3i)**

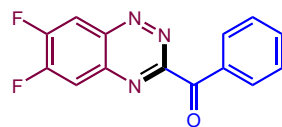

Isolated in 55% yield (29.8 mg) as yellow solid.

$^1\text{H}$  NMR (600 MHz,  $\text{CDCl}_3$ )  $\delta$  8.42 (t,  $J = 8.4$  Hz, 1H), 8.09 (d,  $J = 7.5$  Hz, 2H), 8.02 – 7.93 (m, 1H), 7.69 (t,  $J = 7.4$  Hz, 1H), 7.54 (t,  $J = 7.8$  Hz, 2H).  $^{13}\text{C}$  NMR (151 MHz,  $\text{CDCl}_3$ )  $\delta$  189.91, 158.33 (d,  $J = 2.4$  Hz), 157.12 (dd,  $J = 269.4, 16.9$  Hz), 153.99 (dd,  $J = 265.7, 17.0$  Hz), 145.54 (d,  $J = 10.4$  Hz), 139.15 (d,  $J = 12.6$  Hz), 134.91, 134.45, 131.19, 128.77, 115.47 (d,  $J = 2.3$  Hz), 115.34 (dd,  $J = 9.8, 7.8$  Hz). HRMS (ESI) calcd. for  $\text{C}_{14}\text{H}_8\text{F}_2\text{N}_3\text{O}$   $[\text{M}+\text{H}^+]$ : 272.0630, found: 272.0639.

**(6,7-Dichlorobenzo[*e*][1,2,4]triazin-3-yl)(phenyl)methanone (3j)**

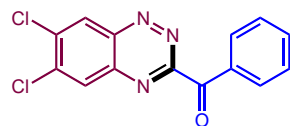

Isolated in 57% yield (34.5 mg) as yellow solid.

$^1\text{H}$  NMR (600 MHz,  $\text{CDCl}_3$ )  $\delta$  8.81 (s, 1H), 8.37 (s, 1H), 8.09 (d,  $J = 7.7$  Hz, 2H), 7.71 – 7.67 (m, 1H), 7.54 (t,  $J = 7.7$  Hz, 2H).  $^{13}\text{C}$  NMR (151 MHz,  $\text{CDCl}_3$ )  $\delta$  189.86, 158.44, 146.09, 142.57, 139.10, 138.18, 134.90, 134.53, 131.22, 130.34, 130.19, 128.83. HRMS (ESI) calcd. for  $\text{C}_{14}\text{H}_8\text{Cl}_2\text{N}_3\text{O}$   $[\text{M}+\text{H}^+]$ : 304.0039, found: 304.0042.

**Benzo[e][1,2,4]triazin-3-yl(2-methoxyphenyl)methanone (3k)**

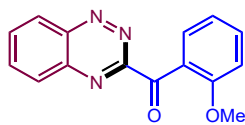

Isolated in 60% yield (31.8 mg) as yellow solid.

$^1\text{H}$  NMR (400 MHz,  $\text{CDCl}_3$ )  $\delta$  8.63 (dd,  $J = 8.4, 0.7$  Hz, 1H), 8.23 (d,  $J = 8.1$  Hz, 1H), 8.11 – 8.04 (m, 1H), 8.02 – 7.94 (m, 2H), 7.63 – 7.56 (m, 1H), 7.19 – 7.13 (m, 1H), 6.95 (d,  $J = 8.4$  Hz, 1H), 3.41 (s, 3H).  $^{13}\text{C}$  NMR (151 MHz,  $\text{CDCl}_3$ )  $\delta$  192.09, 159.84, 159.46, 147.31, 140.74, 136.15, 135.29, 132.06, 131.53, 129.82, 129.76, 126.51, 121.37, 112.01, 55.81. HRMS (ESI) calcd. for  $\text{C}_{15}\text{H}_{12}\text{N}_3\text{O}_2$   $[\text{M}+\text{H}^+]$ : 266.0924, found: 266.0925.

**Benzo[e][1,2,4]triazin-3-yl(4-methoxyphenyl)methanone (3l)**

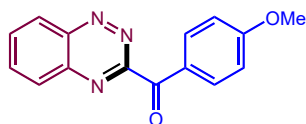

Isolated in 56% yield (29.7 mg) as yellow solid.

$^1\text{H}$  NMR (400 MHz,  $\text{CDCl}_3$ )  $\delta$  8.68 (d,  $J = 8.3$  Hz, 1H), 8.24 (d,  $J = 8.4$  Hz, 1H), 8.18 – 8.08 (m, 3H), 8.07 – 7.99 (m, 1H), 7.01 (d,  $J = 8.9$  Hz, 2H), 3.92 (s, 3H).  $^{13}\text{C}$  NMR (101 MHz,  $\text{CDCl}_3$ )  $\delta$  188.98, 164.64, 158.70, 147.62, 140.47, 136.54, 133.84, 132.51, 129.86, 129.72, 128.22, 114.12, 55.76. HRMS (ESI) calcd. for  $\text{C}_{15}\text{H}_{12}\text{N}_3\text{O}_2$   $[\text{M}+\text{H}^+]$ : 266.0924, found: 266.0926.

**Benzo[e][1,2,4]triazin-3-yl(4-fluorophenyl)methanone (3m)**

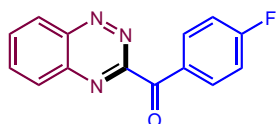

Isolated in 64% yield (32.4 mg) as yellow solid.

$^1\text{H}$  NMR (400 MHz,  $\text{CDCl}_3$ )  $\delta$  8.69 (dd,  $J = 8.4, 0.5$  Hz, 1H), 8.29 – 8.19 (m, 3H), 8.17 – 8.12 (m, 1H), 8.10 – 8.04 (m, 1H), 7.26 – 7.19 (m, 2H).  $^{13}\text{C}$  NMR (101 MHz,  $\text{CDCl}_3$ )  $\delta$  188.86, 166.52 (d,  $J = 257.3$  Hz), 157.87, 144.04 (d,  $J = 731.1$  Hz), 136.78, 134.20, 133.50 (d,  $J = 121.9$  Hz), 131.65 (d,  $J = 3.0$  Hz), 129.87, 129.74, 116.14, 115.92. HRMS (ESI) calcd. for  $\text{C}_{14}\text{H}_9\text{FN}_3\text{O}$   $[\text{M}+\text{H}^+]$ : 254.0724, found: 254.0726.

**Benzo[e][1,2,4]triazin-3-yl(3-chlorophenyl)methanone (3n)**

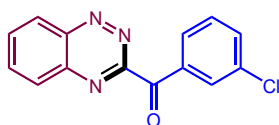

Isolated in 57% yield (30.7 mg) as yellow solid.

$^1\text{H}$  NMR (400 MHz,  $\text{CDCl}_3$ )  $\delta$  8.77 – 8.60 (m, 1H), 8.27 (d,  $J$  = 8.5 Hz, 1H), 8.18 – 8.11 (m, 2H), 8.11 – 7.98 (m, 2H), 7.70 – 7.61 (m, 1H), 7.49 (t,  $J$  = 7.9 Hz, 1H).  $^{13}\text{C}$  NMR (151 MHz,  $\text{CDCl}_3$ )  $\delta$  189.06, 157.33, 147.58, 140.25, 136.70, 134.86, 133.98, 132.90, 130.94, 129.89, 129.76, 129.66, 129.32. HRMS (ESI) calcd. for  $\text{C}_{14}\text{H}_9\text{ClN}_3\text{O}$  [ $\text{M}+\text{H}^+$ ]: 270.0429, found: 270.0431.

**Benzo[e][1,2,4]triazin-3-yl(2-bromophenyl)methanone (3o)**

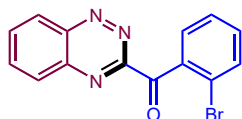

Isolated in 59% yield (36.9 mg) as yellow solid.

$^1\text{H}$  NMR (400 MHz,  $\text{CDCl}_3$ )  $\delta$  8.67 (d,  $J$  = 8.3 Hz, 1H), 8.27 (d,  $J$  = 8.4 Hz, 1H), 8.16 – 8.10 (m, 1H), 8.09 – 8.03 (m, 1H), 7.82 – 7.74 (m, 1H), 7.65 (d,  $J$  = 7.9 Hz, 1H), 7.54 (t,  $J$  = 7.4 Hz, 1H), 7.47 (td,  $J$  = 7.6, 1.3 Hz, 1H).  $^{13}\text{C}$  NMR (101 MHz,  $\text{CDCl}_3$ )  $\delta$  192.86, 156.67, 147.36, 140.74, 139.12, 136.62, 133.34, 133.13, 133.05, 131.37, 130.02, 129.82, 127.76, 121.26. HRMS (ESI) calcd. for  $\text{C}_{14}\text{H}_9\text{BrN}_3\text{O}$  [ $\text{M}+\text{H}^+$ ]: 313.9924, found: 313.9926.

**Benzo[e][1,2,4]triazin-3-yl(2-iodophenyl)methanone (3p)**

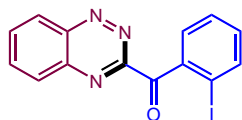

Isolated in 60% yield (43.3 mg) as yellow solid.

$^1\text{H}$  NMR (400 MHz,  $\text{CDCl}_3$ )  $\delta$  8.67 (d,  $J$  = 8.3 Hz, 1H), 8.26 (d,  $J$  = 8.4 Hz, 1H), 8.13 (t,  $J$  = 7.5 Hz, 1H), 8.07 (t,  $J$  = 7.6 Hz, 1H), 7.94 (d,  $J$  = 7.9 Hz, 1H), 7.68 (d,  $J$  = 7.6 Hz, 1H), 7.56 (t,  $J$  = 7.5 Hz, 1H), 7.28 (t,  $J$  = 7.7 Hz, 1H).  $^{13}\text{C}$  NMR (101 MHz,  $\text{CDCl}_3$ )  $\delta$  193.77, 155.94, 147.25, 142.63, 140.70, 139.85, 136.65, 133.22, 132.75, 131.09, 130.02, 129.80, 128.29, 93.47. HRMS (ESI) calcd. for  $\text{C}_{14}\text{H}_9\text{IN}_3\text{O}$  [ $\text{M}+\text{H}^+$ ]: 361.9785, found: 361.9786.

**benzo[e][1,2,4]triazin-3-yl(3,4-dichlorophenyl)methanone (3q)**

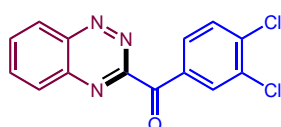

Isolated in 77% yield (46.7 mg) as yellow solid.

$^1\text{H}$  NMR (400 MHz,  $\text{CDCl}_3$ )  $\delta$  8.70 (dd,  $J$  = 8.4, 0.7 Hz, 1H), 8.30 (d,  $J$  = 2.0 Hz, 1H), 8.27 (d,  $J$  = 8.4 Hz, 1H), 8.18 – 8.13 (m, 1H), 8.11 – 8.02 (m, 2H), 7.63 (d,  $J$  = 8.4 Hz, 1H).  $^{13}\text{C}$  NMR (101 MHz,  $\text{CDCl}_3$ )

$\delta$  188.14, 157.10, 147.75, 140.41, 139.02, 136.97, 134.86, 133.45, 133.23, 133.08, 130.86, 130.33, 129.92, 129.83. HRMS (ESI) calcd. for  $C_{14}H_8Cl_2N_3O$   $[M+H]^+$ : 304.0039, found: 304.0041.

**(5-Bromo-2-chlorophenyl)(7-methylbenzo[*e*][1,2,4]triazin-3-yl)methanone (3r)**

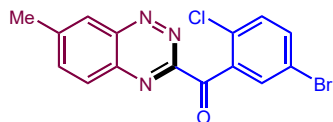

Isolated in 56% yield (40.4 mg) as yellow solid.

$^1H$  NMR (400 MHz,  $CDCl_3$ )  $\delta$  8.41 (s, 1H), 8.16 (d,  $J$  = 8.7 Hz, 1H), 7.96 (dd,  $J$  = 8.7, 1.4 Hz, 1H), 7.89 (d,  $J$  = 2.3 Hz, 1H), 7.65 (dd,  $J$  = 8.5, 2.3 Hz, 1H), 7.32 (d,  $J$  = 8.5 Hz, 1H), 2.73 (s, 3H).  $^{13}C$  NMR (101 MHz,  $CDCl_3$ )  $\delta$  190.93, 156.16, 147.47, 145.00, 139.50, 139.45, 138.83, 135.70, 133.66, 131.89, 131.64, 129.48, 128.07, 120.98, 22.47. HRMS (ESI) calcd. for  $C_{15}H_{10}BrClN_3O$   $[M+H]^+$ : 361.9690, found: 361.9695.

**Ethyl 2-(1H-benzo[*d*][1,2,3]triazol-1-yl)acetate (5a)**

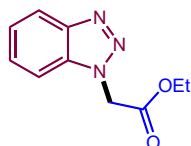

Isolated in 80% yield (32.8 mg) as yellow liquid.

$^1H$  NMR (400 MHz,  $CDCl_3$ )  $\delta$  8.08 – 8.04 (m, 1H), 7.52 – 7.43 (m, 2H), 7.40 – 7.34 (m, 1H), 5.40 (s, 2H), 4.22 (q,  $J$  = 7.1 Hz, 2H), 1.24 (t,  $J$  = 7.1 Hz, 3H).  $^{13}C$  NMR (101 MHz,  $CDCl_3$ )  $\delta$  166.45, 146.06, 133.45, 127.97, 124.18, 120.21, 109.33, 62.39, 49.14, 14.12. HRMS (ESI) calcd. for  $C_{10}H_{12}N_3O_2$   $[M+H]^+$ : 206.0924, found: 206.0921.

**Ethyl 2-(5,6-dimethyl-1H-benzo[*d*][1,2,3]triazol-1-yl)acetate (5b)**

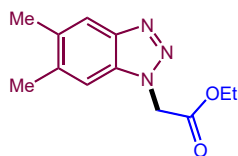

Isolated in 66% yield (30.8 mg) as white solid.

$^1H$  NMR (400 MHz,  $CDCl_3$ )  $\delta$  7.80 (s, 1H), 7.21 (s, 1H), 5.35 (s, 2H), 4.25 (q,  $J$  = 7.1 Hz, 2H), 2.41 (s, 3H), 2.40 (s, 3H), 1.26 (t,  $J$  = 7.1 Hz, 3H).  $^{13}C$  NMR (101 MHz,  $CDCl_3$ )  $\delta$  166.68, 145.35, 138.49, 134.08, 132.56, 119.36, 108.76, 62.37, 49.16, 21.11, 20.53, 14.21. HRMS (ESI) calcd. for  $C_{12}H_{16}N_3O_2$   $[M+H]^+$ : 234.1237, found: 234.1234.

**Ethyl 2-(5,6-difluoro-1H-benzo[*d*][1,2,3]triazol-1-yl)acetate (5c)**

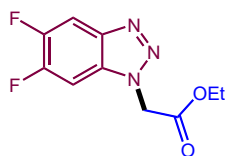

Isolated in 63% yield (30.4 mg) as white solid.

$^1\text{H}$  NMR (400 MHz,  $\text{CDCl}_3$ )  $\delta$  7.84 (dd,  $J = 9.0, 7.1$  Hz, 1H), 7.30 (dd,  $J = 8.6, 6.6$  Hz, 1H), 5.39 (s, 2H), 4.28 (q,  $J = 7.1$  Hz, 2H), 1.30 (t,  $J = 7.1$  Hz, 3H).  $^{13}\text{C}$  NMR (101 MHz,  $\text{CDCl}_3$ )  $\delta$  166.05, 150.67 (dd,  $J = 524.7, 16.7$  Hz), 150.64 (dd,  $J = 22.3, 16.5$  Hz), 141.29 (d,  $J = 9.7$  Hz), 129.47 (d,  $J = 11.4$  Hz), 106.81 (dd,  $J = 20.2, 1.7$  Hz), 97.16 (d,  $J = 23.7$  Hz), 62.72, 49.47, 14.17. HRMS (ESI) calcd. for  $\text{C}_{10}\text{H}_{10}\text{F}_2\text{N}_3\text{O}_2$   $[\text{M}+\text{H}^+]$ : 242.0736, found: 242.0735.

**Ethyl 2-(5,6-dichloro-1H-benzo[d][1,2,3]triazol-1-yl)acetate (5d)**

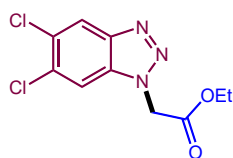

Isolated in 82% yield (44.8 mg) as white solid.

$^1\text{H}$  NMR (400 MHz,  $\text{CDCl}_3$ )  $\delta$  8.18 (s, 1H), 7.64 (s, 1H), 5.37 (s, 2H), 4.27 (q,  $J = 7.1$  Hz, 2H), 1.28 (t,  $J = 7.1$  Hz, 3H).  $^{13}\text{C}$  NMR (101 MHz,  $\text{CDCl}_3$ )  $\delta$  165.89, 144.96, 133.18, 132.44, 129.11, 121.07, 110.85, 62.68, 49.29, 14.08. HRMS (ESI) calcd. for  $\text{C}_{10}\text{H}_{10}\text{Cl}_2\text{N}_3\text{O}_2$   $[\text{M}+\text{H}^+]$ : 274.0145, found: 274.0144.

**Ethyl 2-(5-chloro-1H-benzo[d][1,2,3]triazol-1-yl)acetate (5e)**

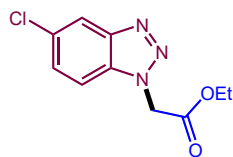

Isolated in 31% yield (14.8 mg) as white solid.

$^1\text{H}$  NMR (400 MHz,  $\text{CDCl}_3$ )  $\delta$  8.05 (d,  $J = 1.1$  Hz, 1H), 7.47 (dd,  $J = 8.8, 1.6$  Hz, 1H), 7.41 (d,  $J = 8.8$  Hz, 1H), 5.40 (s, 2H), 4.25 (q,  $J = 7.1$  Hz, 2H), 1.26 (t,  $J = 7.1$  Hz, 3H).  $^{13}\text{C}$  NMR (101 MHz,  $\text{CDCl}_3$ )  $\delta$  166.17, 146.78, 132.21, 130.20, 128.97, 119.66, 110.46, 62.61, 49.38, 14.17. HRMS (ESI) calcd. for  $\text{C}_{10}\text{H}_{11}\text{ClN}_3\text{O}_2$   $[\text{M}+\text{H}^+]$ : 240.0534, found: 240.0534.

**Ethyl 2-(6-chloro-1H-benzo[d][1,2,3]triazol-1-yl)acetate (5e')**

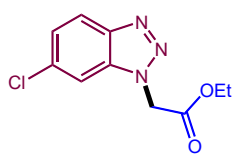

Isolated in 38% yield (18.2 mg) as white solid.

$^1\text{H}$  NMR (400 MHz,  $\text{CDCl}_3$ )  $\delta$  7.95 (d,  $J$  = 8.8 Hz, 1H), 7.47 (d,  $J$  = 1.3 Hz, 1H), 7.31 (dd,  $J$  = 8.8, 1.7 Hz, 1H), 5.35 (s, 2H), 4.22 (q,  $J$  = 7.1 Hz, 2H), 1.24 (t,  $J$  = 7.1 Hz, 3H).  $^{13}\text{C}$  NMR (101 MHz,  $\text{CDCl}_3$ )  $\delta$  166.16, 144.61, 134.41, 134.03, 125.39, 121.08, 109.36, 62.52, 49.12, 14.08. HRMS (ESI) calcd. for  $\text{C}_{10}\text{H}_{11}\text{ClN}_3\text{O}_2$   $[\text{M}+\text{H}^+]$ : 240.0534, found: 240.0534.

**Methyl 2-(1H-benzo[d][1,2,3]triazol-1-yl)acetate (5f)**

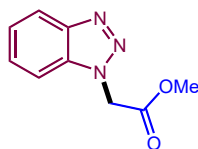

Isolated in 74% yield (28.3 mg) as yellow solid.

$^1\text{H}$  NMR (400 MHz,  $\text{CDCl}_3$ )  $\delta$  8.04 (d,  $J$  = 8.4 Hz, 1H), 7.50 – 7.42 (m, 2H), 7.38 – 7.33 (m, 1H), 5.40 (s, 2H), 3.74 (s, 3H).  $^{13}\text{C}$  NMR (101 MHz,  $\text{CDCl}_3$ )  $\delta$  166.92, 146.01, 133.39, 127.99, 124.18, 120.15, 109.27, 52.99, 48.89. HRMS (ESI) calcd. for  $\text{C}_9\text{H}_{10}\text{N}_3\text{O}_2$   $[\text{M}+\text{H}^+]$ : 192.0768, found: 192.0764.

**1-(1H-Benzo[d][1,2,3]triazol-1-yl)propan-2-one (5g)**

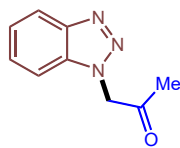

Isolated in 20% yield (7.0 mg) as yellow solid.

$^1\text{H}$  NMR (400 MHz,  $\text{CDCl}_3$ )  $\delta$  8.09 (d,  $J$  = 8.3 Hz, 1H), 7.55 – 7.48 (m, 1H), 7.43 – 7.36 (m, 2H), 5.45 (s, 2H), 2.22 (s, 3H).  $^{13}\text{C}$  NMR (101 MHz,  $\text{CDCl}_3$ )  $\delta$  200.04, 146.09, 133.53, 128.16, 124.34, 120.34, 109.19, 56.92, 27.23. HRMS (ESI) calcd. for  $\text{C}_{10}\text{H}_{10}\text{N}_3\text{O}$   $[\text{M}+\text{H}^+]$ : 176.0818, found: 176.0813.

**Ethyl 2-(1H-benzo[d][1,2,3]triazol-1-yl)propanoate (5h)**

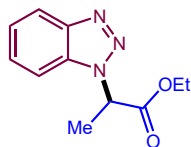

Isolated in 79% yield (34.6 mg) as yellow liquid.

$^1\text{H}$  NMR (400 MHz,  $\text{CDCl}_3$ )  $\delta$  8.09 (d,  $J$  = 8.4 Hz, 1H), 7.58 – 7.46 (m, 2H), 7.42 – 7.36 (m, 1H), 5.71 (q,  $J$  = 7.4 Hz, 1H), 4.21 (q,  $J$  = 7.1 Hz, 2H), 2.03 (d,  $J$  = 7.4 Hz, 3H), 1.20 (t,  $J$  = 7.1 Hz, 3H).  $^{13}\text{C}$  NMR (101 MHz,  $\text{CDCl}_3$ )  $\delta$  169.31, 146.44, 132.61, 127.67, 124.17, 120.37, 110.08, 62.38, 57.42, 16.83, 14.12. HRMS (ESI) calcd. for  $\text{C}_{11}\text{H}_{14}\text{N}_3\text{O}_2$   $[\text{M}+\text{H}^+]$ : 220.1081, found: 220.1076.

**Ethyl-4-(1H-benzo[d][1,2,3]triazol-1-yl)but-2-enoate (5i)**

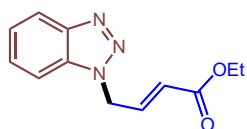

Isolated in 35% yield (16.2 mg) as yellow liquid.

$^1\text{H}$  NMR (400 MHz,  $\text{CDCl}_3$ )  $\delta$  8.15 – 8.06 (m, 1H), 7.56 – 7.46 (m, 2H), 7.45 – 7.40 (m, 1H), 7.12 (dt,  $J$  = 15.7, 5.2 Hz, 1H), 5.75 (dt,  $J$  = 15.7, 1.8 Hz, 1H), 5.46 (dd,  $J$  = 5.2, 1.8 Hz, 2H), 4.18 (q,  $J$  = 7.1 Hz, 2H), 1.26 (t,  $J$  = 7.1 Hz, 3H).  $^{13}\text{C}$  NMR (101 MHz,  $\text{CDCl}_3$ )  $\delta$  165.33, 146.24, 139.83, 132.95, 127.99, 124.40, 124.35, 120.42, 109.30, 61.00, 48.67, 14.23. HRMS (ESI) calcd. for  $\text{C}_{12}\text{H}_{14}\text{N}_3\text{O}_2$   $[\text{M}+\text{H}^+]$ : 232.1081, found: 232.1080.

**1-Benzyl-1H-benzo[d][1,2,3]triazole (5j)**

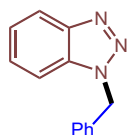

Isolated in 84% yield (35.1 mg) as white solid.

$^1\text{H}$  NMR (400 MHz,  $\text{CDCl}_3$ )  $\delta$  8.10 – 8.06 (m, 1H), 7.44 – 7.27 (m, 8H), 5.86 (s, 2H).  $^{13}\text{C}$  NMR (101 MHz,  $\text{CDCl}_3$ )  $\delta$  146.46, 134.87, 132.93, 129.15, 128.62, 127.72, 127.55, 124.08, 120.22, 109.86, 52.42. HRMS (ESI) calcd. for  $\text{C}_{13}\text{H}_{12}\text{N}_3$   $[\text{M}+\text{H}^+]$ : 210.1026, found: 210.1022.

**1-(2-Methylbenzyl)-1H-benzo[d][1,2,3]triazole (5k)**

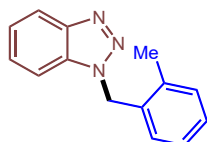

Isolated in 82% yield (36.6 mg) as white solid.

$^1\text{H}$  NMR (400 MHz,  $\text{CDCl}_3$ )  $\delta$  8.05 (d,  $J$  = 7.9 Hz, 1H), 7.39 – 7.29 (m, 2H), 7.28 – 7.12 (m, 4H), 7.04 (d,  $J$  = 7.6 Hz, 1H), 5.83 (s, 2H), 2.33 (s, 3H).  $^{13}\text{C}$  NMR (101 MHz,  $\text{CDCl}_3$ )  $\delta$  146.32, 136.61, 133.06, 132.65, 131.01, 128.74, 128.57, 127.40, 126.48, 123.94, 120.10, 109.93, 50.84, 19.33. HRMS (ESI) calcd. for  $\text{C}_{14}\text{H}_{14}\text{N}_3$   $[\text{M}+\text{H}^+]$ : 224.1182, found: 224.1180.

**1-(4-Nitrobenzyl)-1H-benzo[d][1,2,3]triazole (5l)**

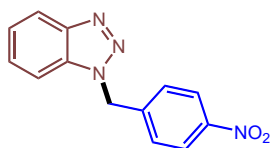

Isolated in 92% yield (46.8 mg) as yellow solid

$^1\text{H}$  NMR (400 MHz,  $\text{CDCl}_3$ )  $\delta$  8.18 (d,  $J$  = 8.6 Hz, 2H), 8.09 (d,  $J$  = 8.2 Hz, 1H), 7.50 – 7.44 (m, 1H), 7.43 – 7.35 (m, 4H), 5.97 (s, 2H).  $^{13}\text{C}$  NMR (101 MHz,  $\text{CDCl}_3$ )  $\delta$  147.97, 146.34, 141.95, 132.77, 128.33, 128.07, 124.41, 124.31, 120.40, 109.19, 51.17. HRMS (ESI) calcd. for  $\text{C}_{13}\text{H}_{11}\text{N}_3\text{O}_2$  [ $\text{M}+\text{H}^+$ ]: 255.0877, found: 255.0878.

**Benzo[*e*][1,2,4]triazin-3-yl(2-((4-methoxyphenyl)ethynyl)phenyl)methanone (6)**

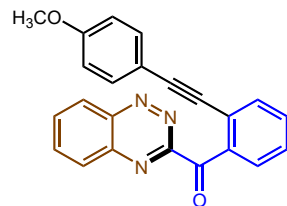

Isolated in 90% yield (65.7 mg) as white solid.

$^1\text{H}$  NMR (400 MHz,  $\text{CDCl}_3$ )  $\delta$  8.48 (d,  $J$  = 8.4 Hz, 1H), 8.16 (d,  $J$  = 8.5 Hz, 1H), 8.05 – 7.94 (m, 2H), 7.92 – 7.84 (m, 1H), 7.63 – 7.49 (m, 3H), 6.67 (d,  $J$  = 8.7 Hz, 2H), 6.51 (d,  $J$  = 8.7 Hz, 2H), 3.70 (s, 3H).  $^{13}\text{C}$  NMR (101 MHz,  $\text{CDCl}_3$ )  $\delta$  193.17, 159.71, 158.74, 147.46, 140.69, 138.71, 136.18, 133.14, 132.64, 132.61, 132.37, 130.41, 129.73, 129.68, 128.45, 124.30, 113.84, 113.69, 97.07, 86.67, 55.35. HRMS (ESI) calcd. for  $\text{C}_{23}\text{H}_{16}\text{N}_3\text{O}_2$  [ $\text{M}+\text{H}^+$ ]: 366.1237, found: 366.1239.

**11-(4-Methoxyphenyl)-6H-indeno[2,1-*b*]quinolin-6-one (7)**

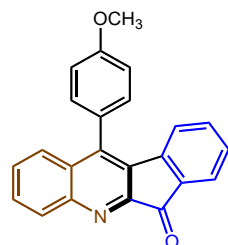

Isolated in 75% yield (50.6 mg) as white solid.

$^1\text{H}$  NMR (400 MHz,  $\text{CDCl}_3$ )  $\delta$  8.31 (d,  $J$  = 8.1 Hz, 1H), 7.81 (s, 1H), 7.68 (t,  $J$  = 7.1 Hz, 1H), 7.57 (d,  $J$  = 7.9 Hz, 1H), 7.54 – 7.48 (m, 1H), 7.39 – 7.28 (m, 4H), 7.17 (d,  $J$  = 8.0 Hz, 2H), 6.71 – 6.60 (m, 1H), 3.97 (s, 3H).  $^{13}\text{C}$  NMR (101 MHz,  $\text{CDCl}_3$ )  $\delta$  192.75, 160.26, 154.16, 148.60, 143.44, 141.86, 135.92, 134.71, 131.94, 131.34, 130.35, 130.19, 130.00, 129.52, 129.23, 127.02, 126.75, 124.91, 124.09, 114.95, 55.59. HRMS (ESI) calcd. for  $\text{C}_{23}\text{H}_{16}\text{NO}_2$  [ $\text{M}+\text{H}^+$ ]: 338.1176, found: 338.1177.

## 7. Spectra of new compounds

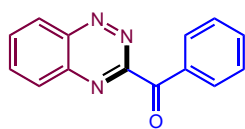

**3a**

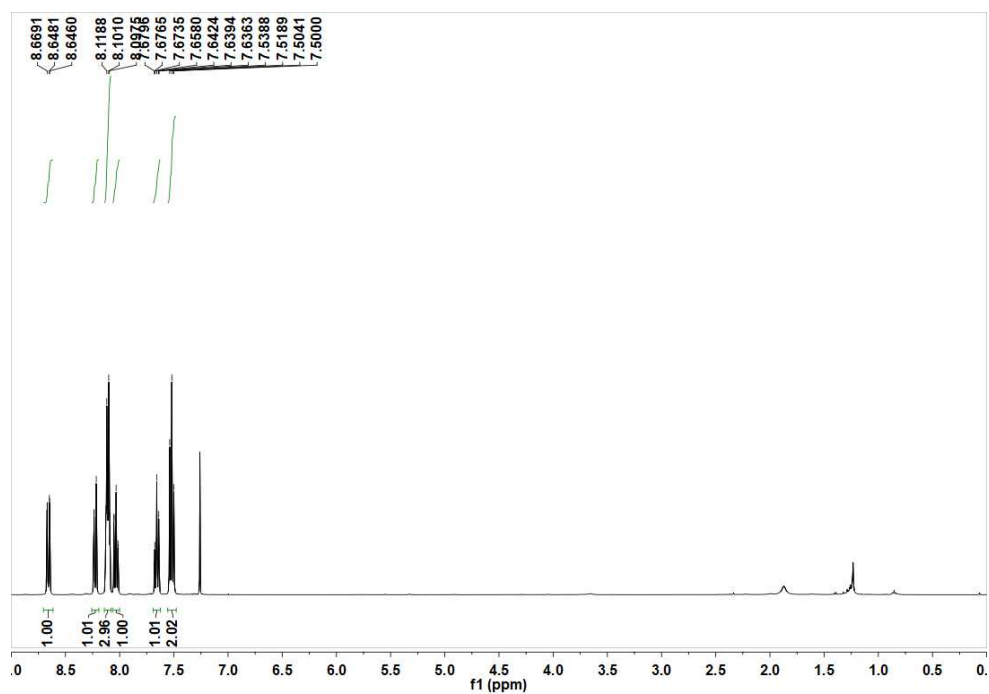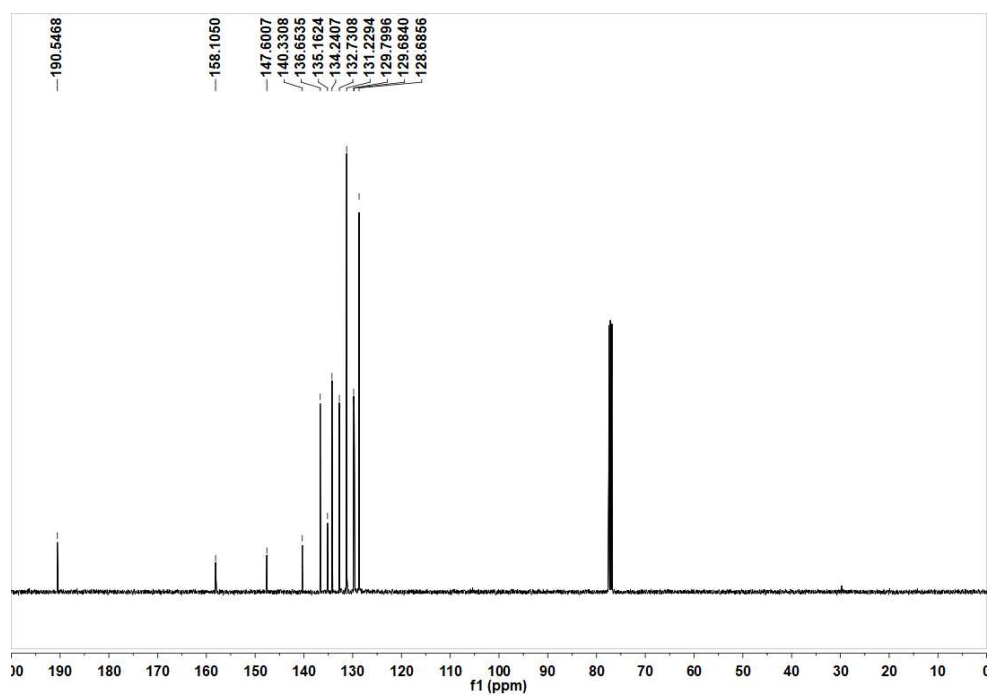

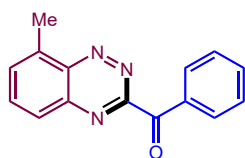

3b

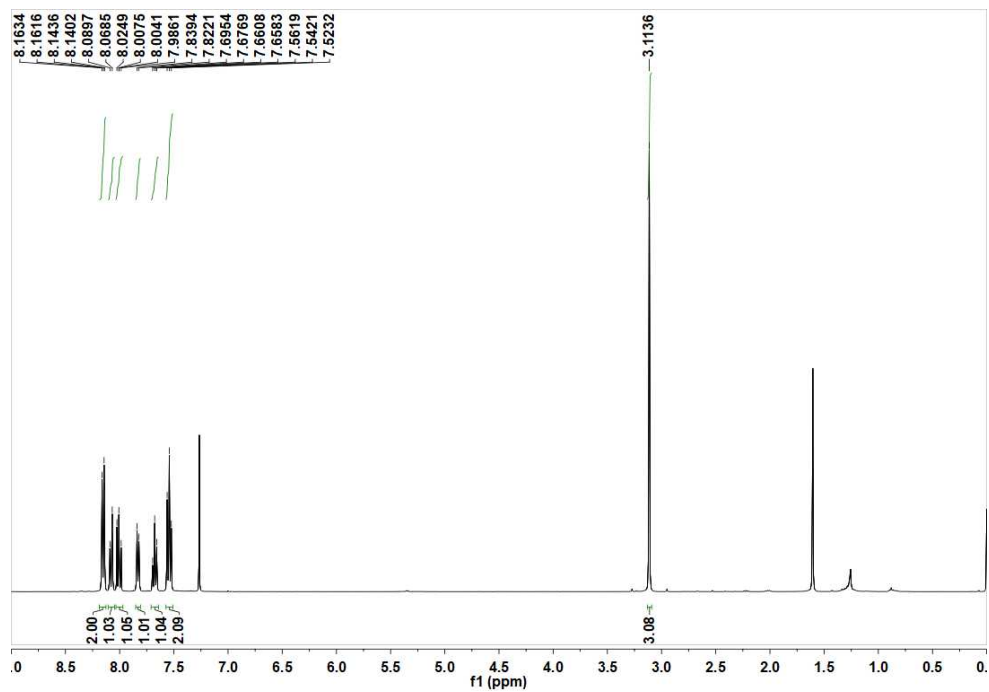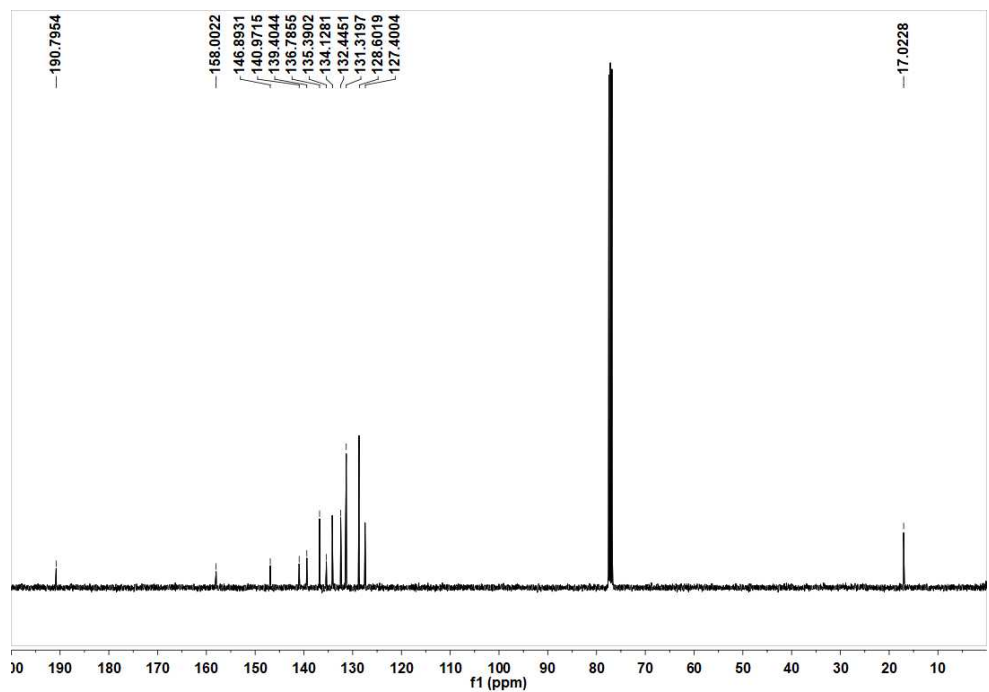

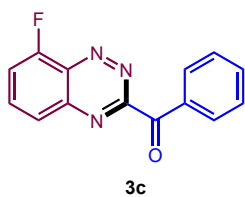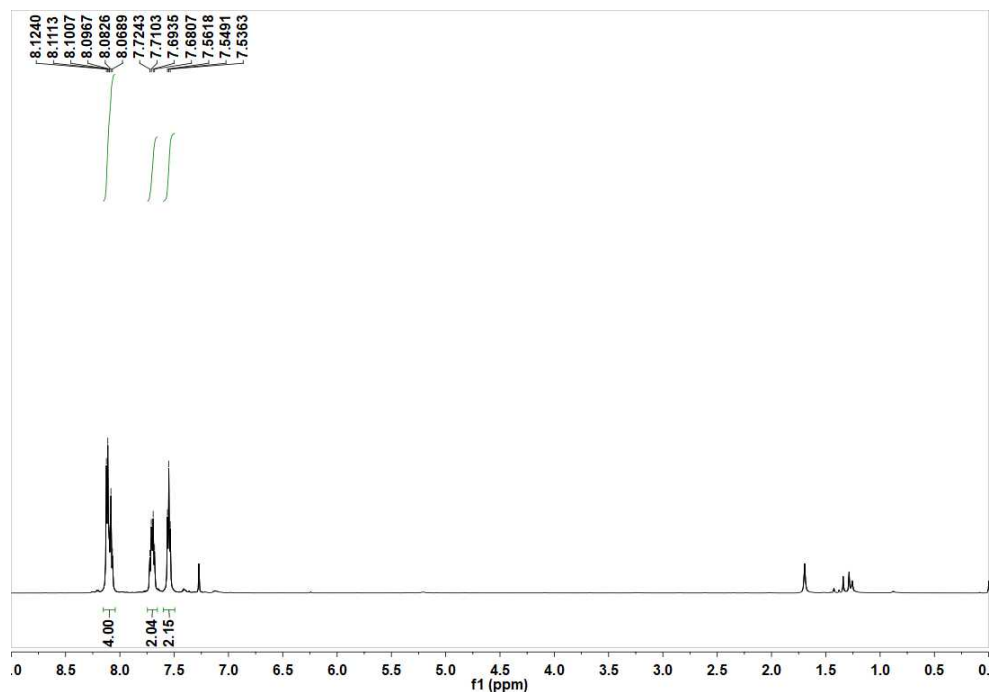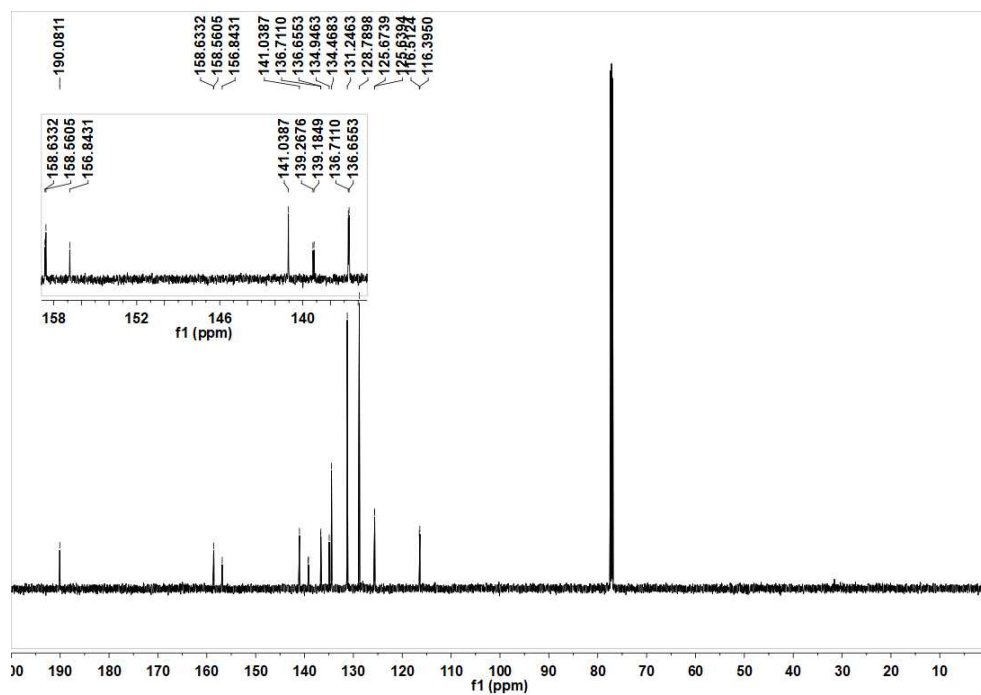

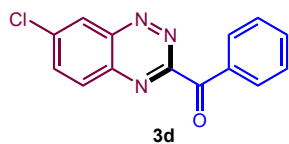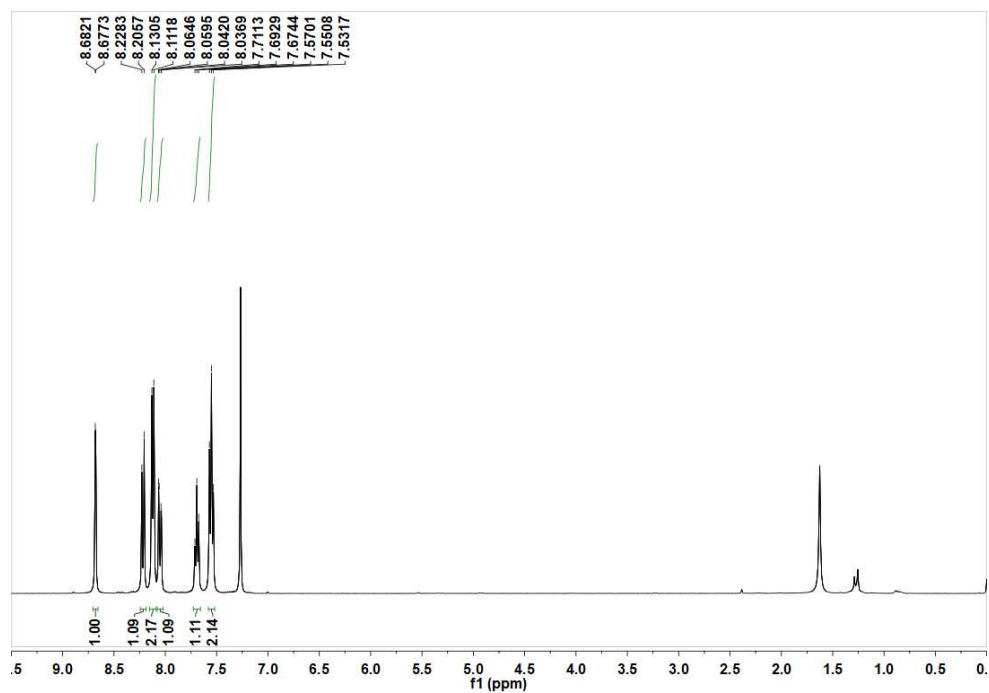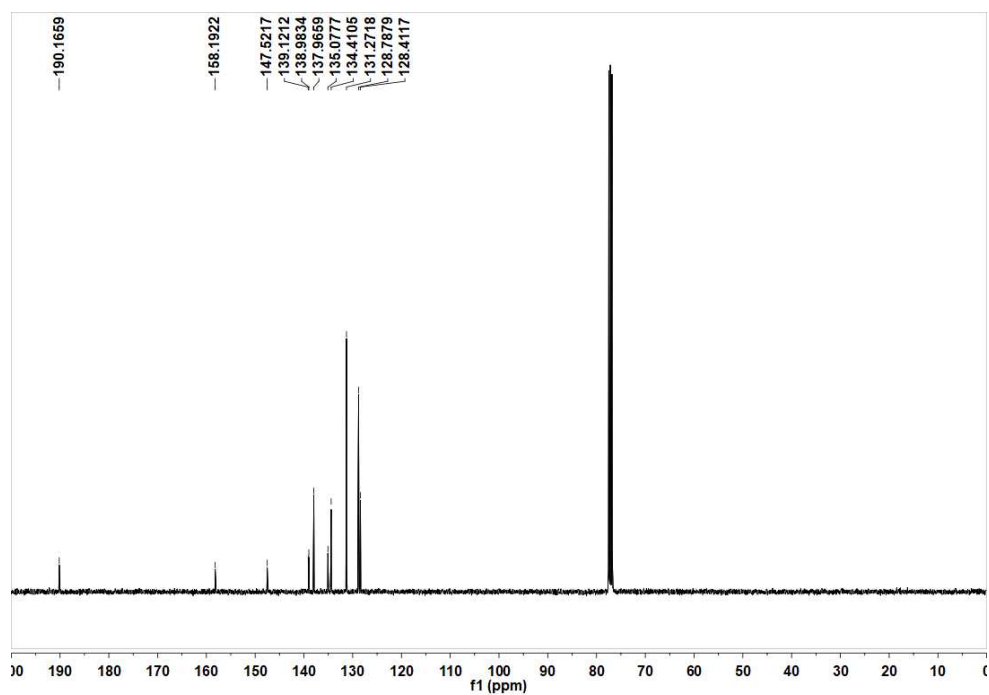

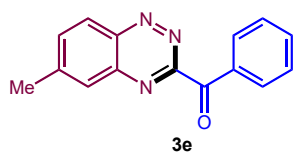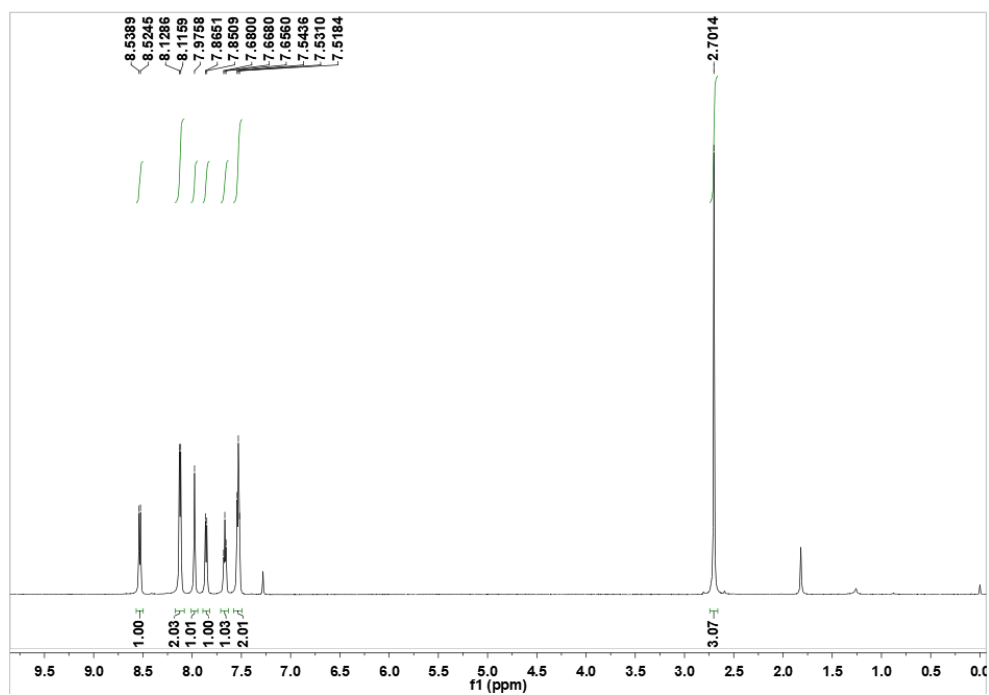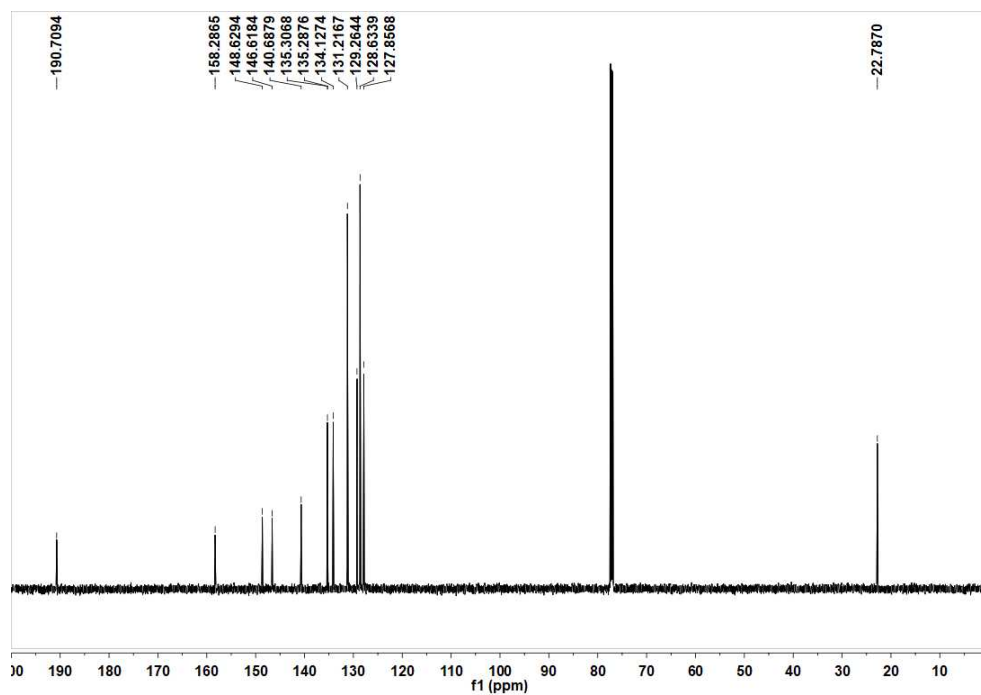

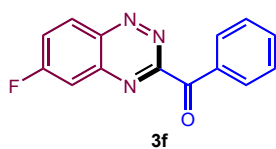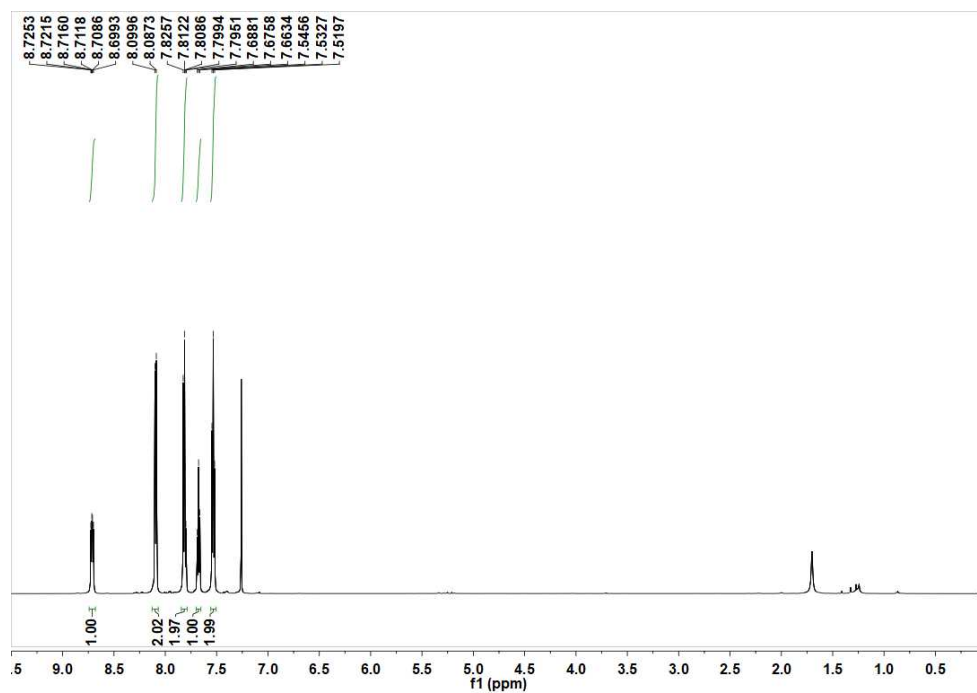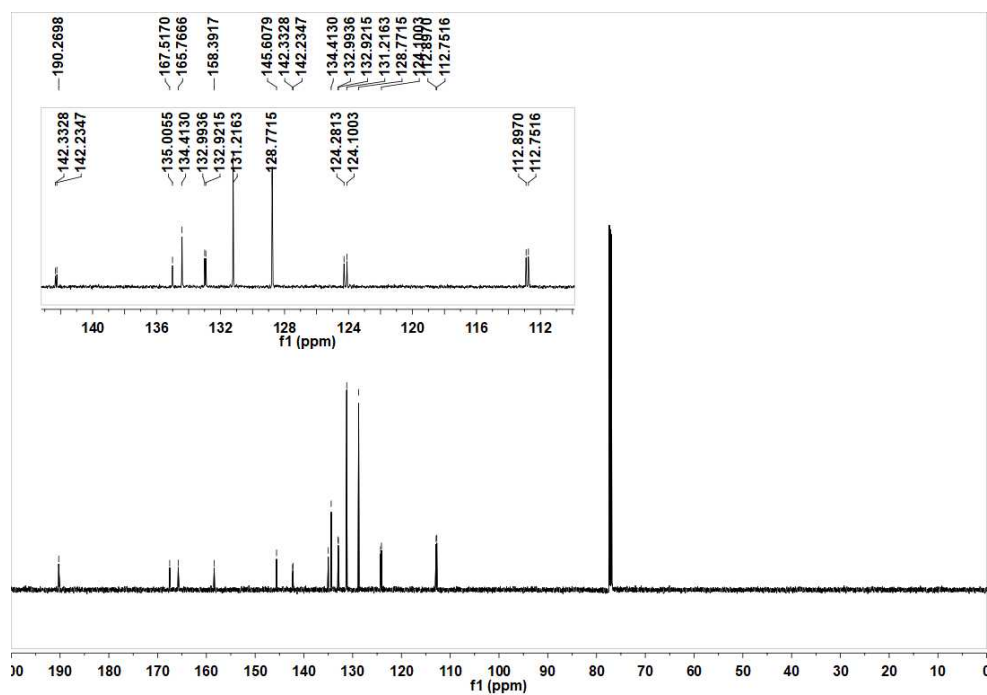

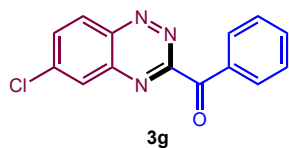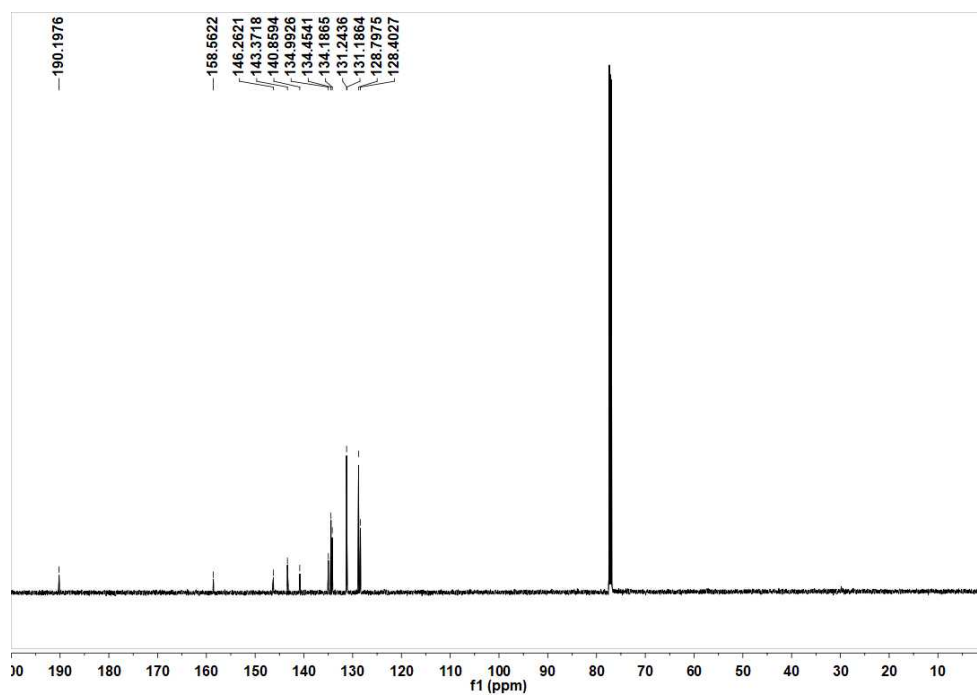

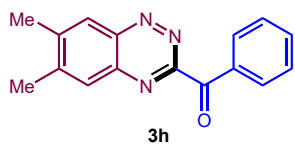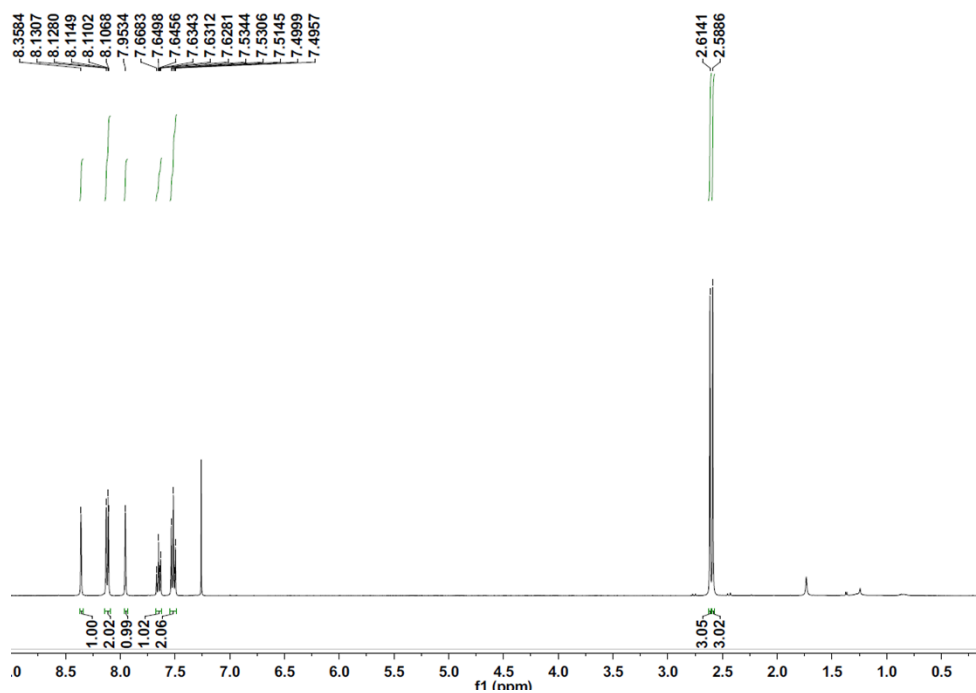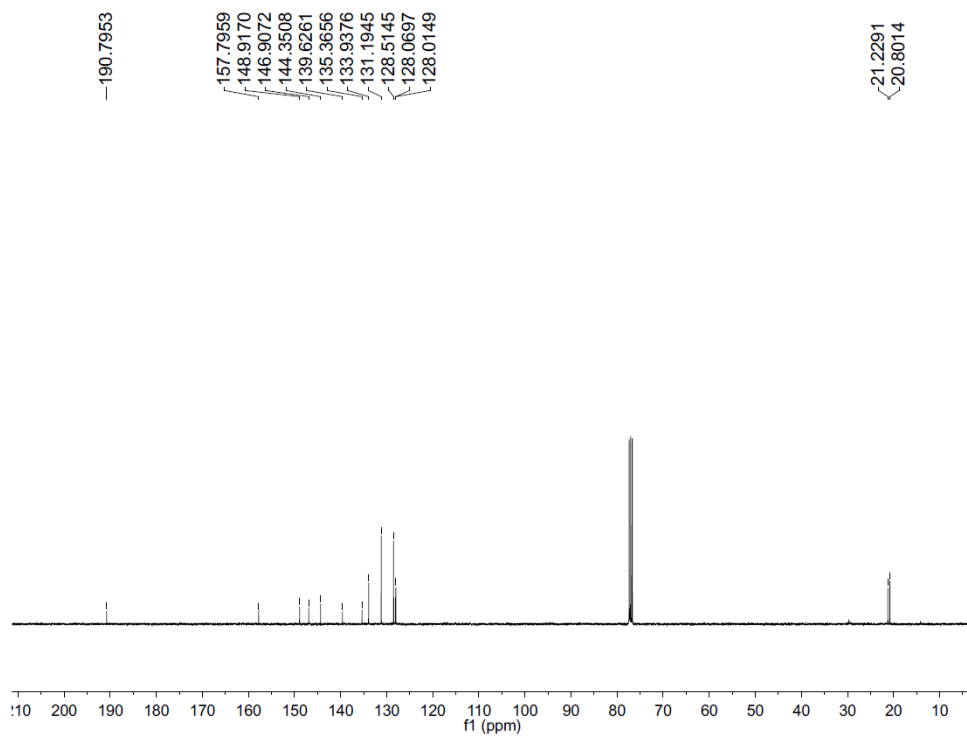

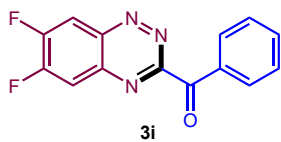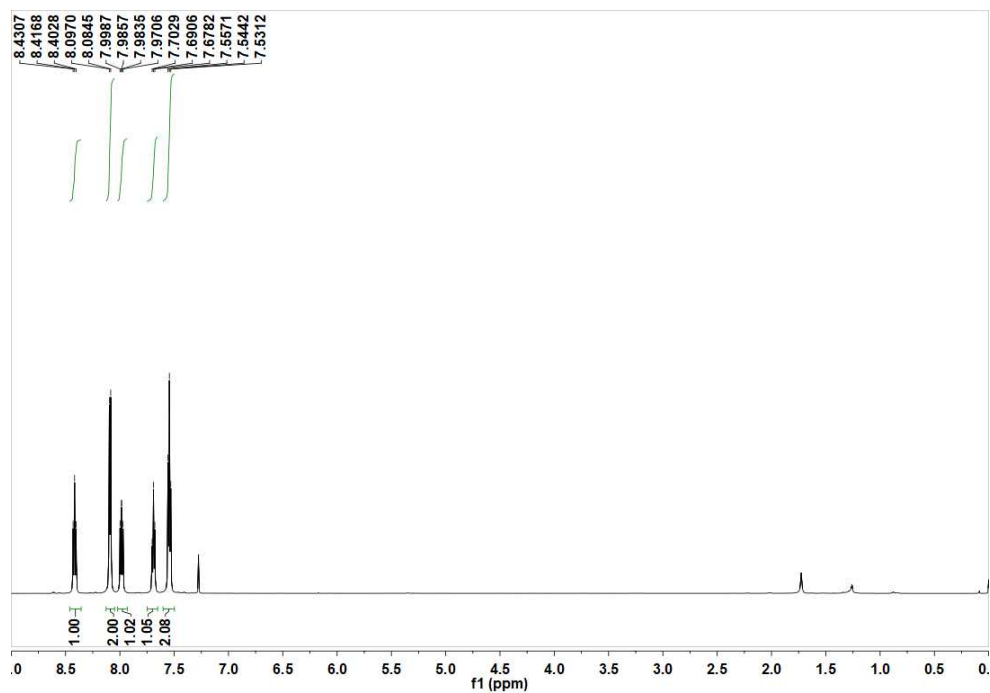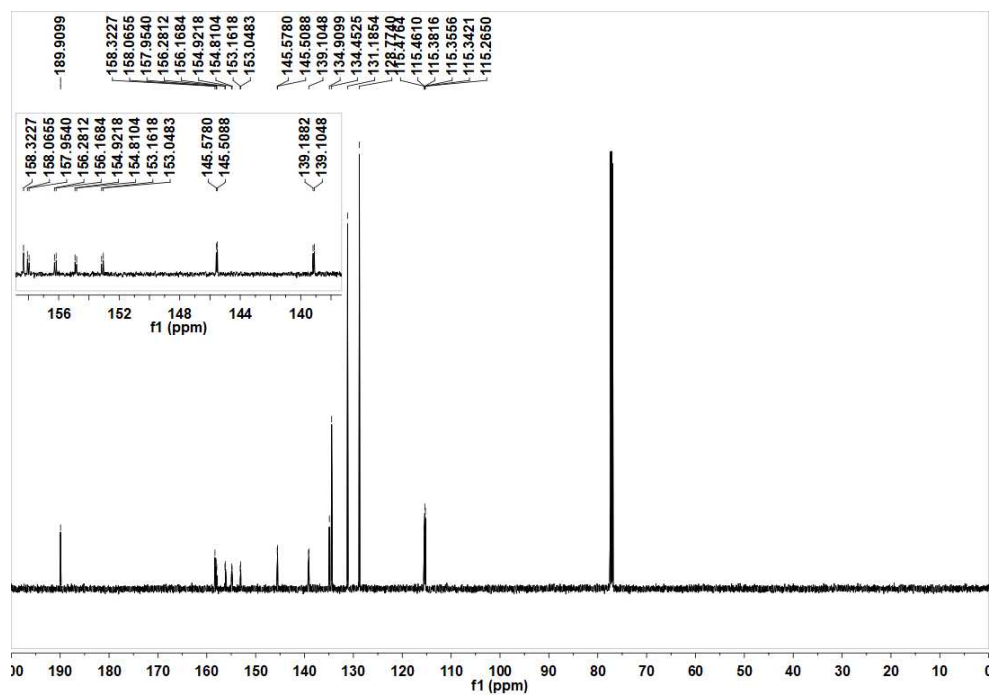

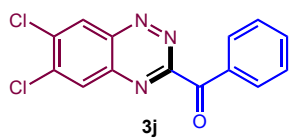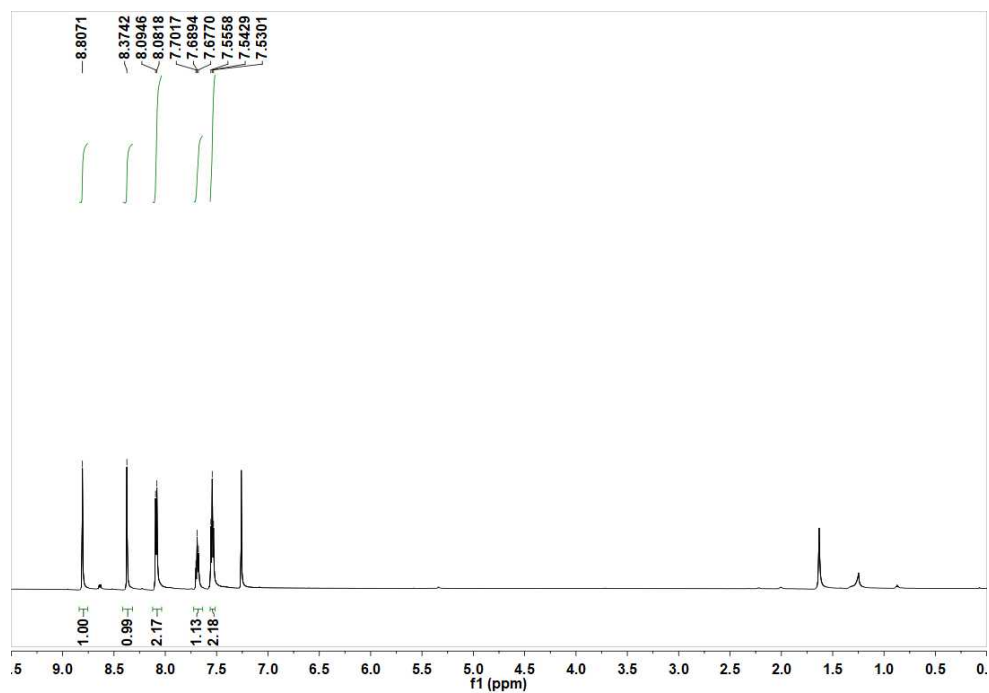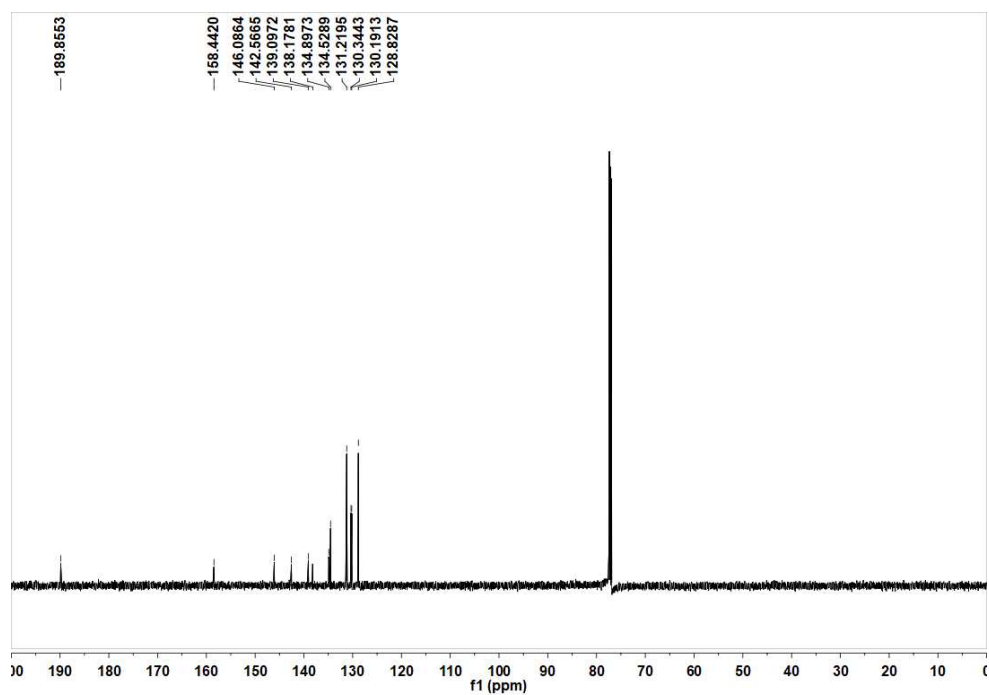

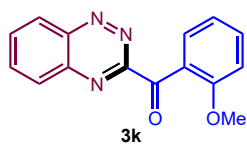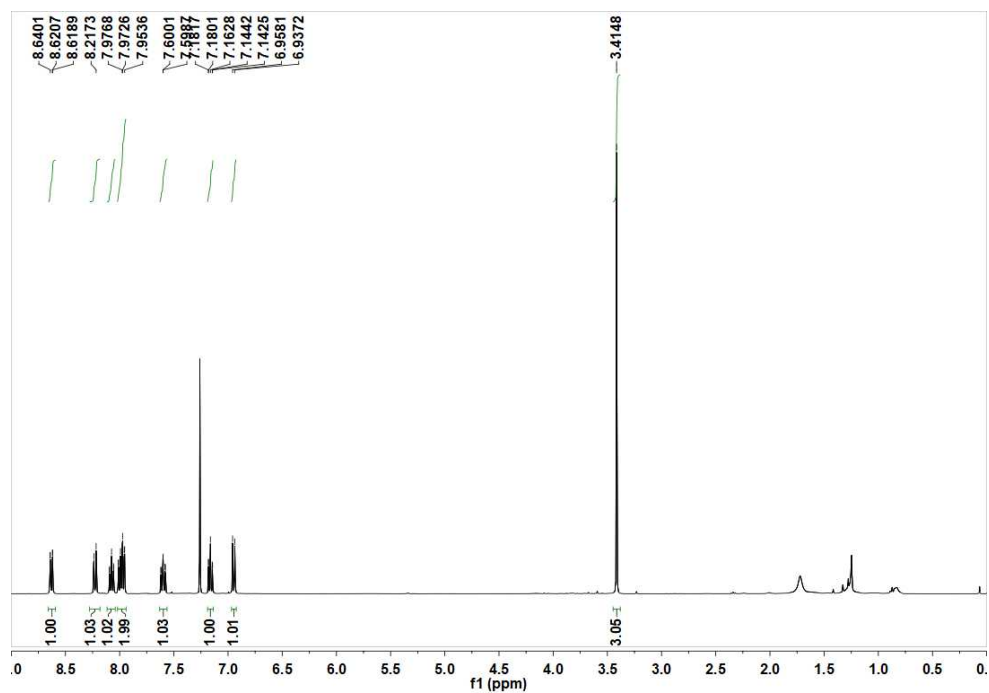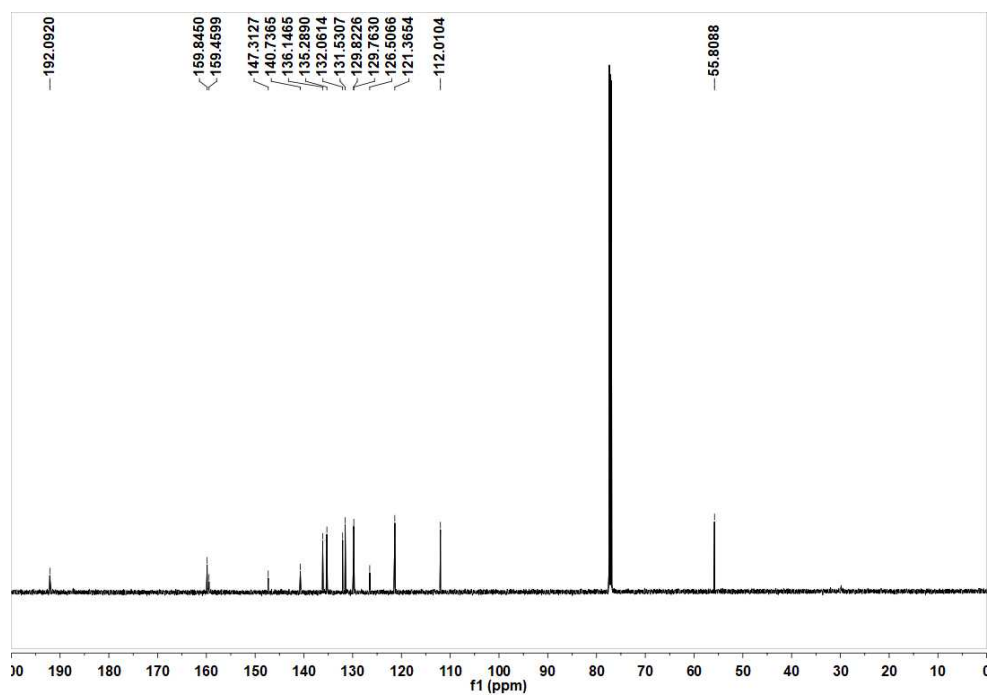

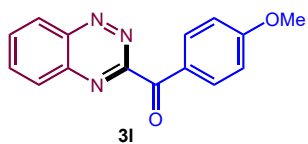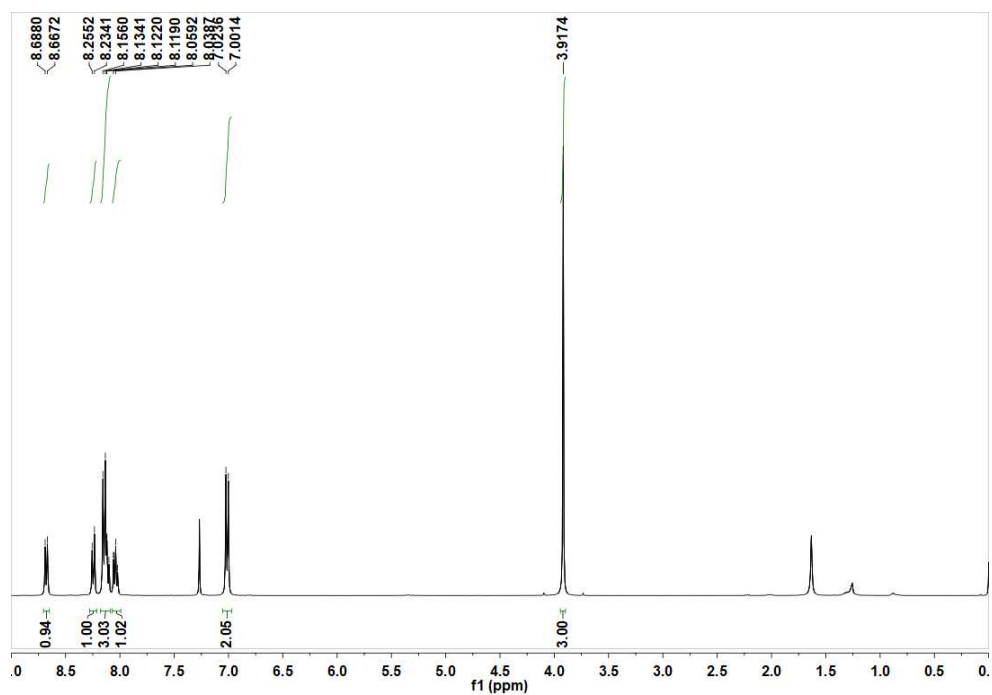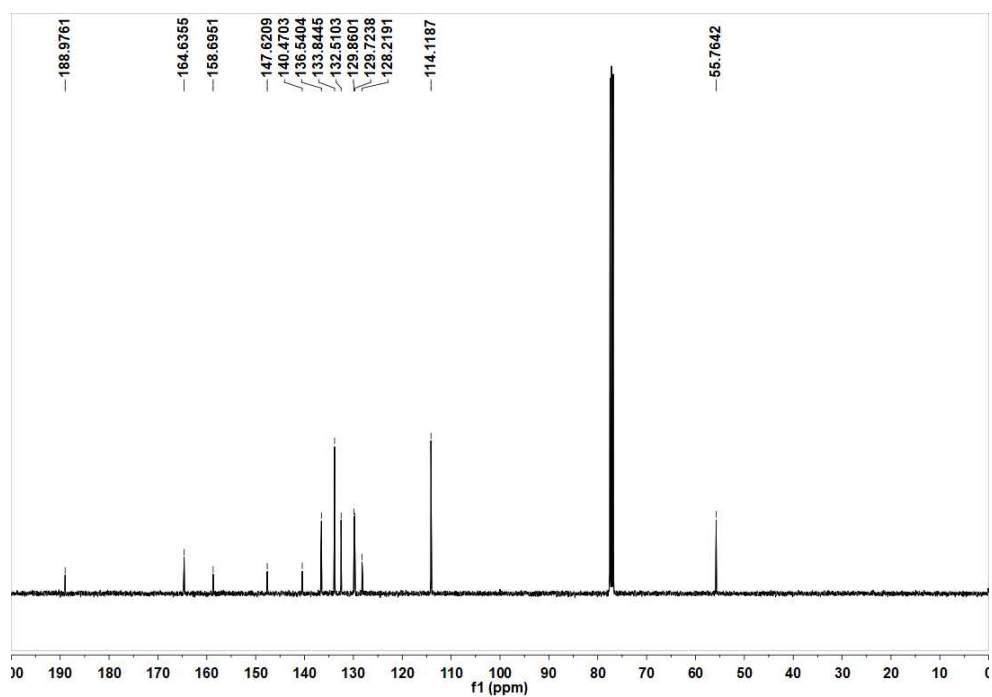

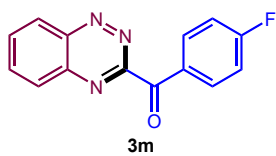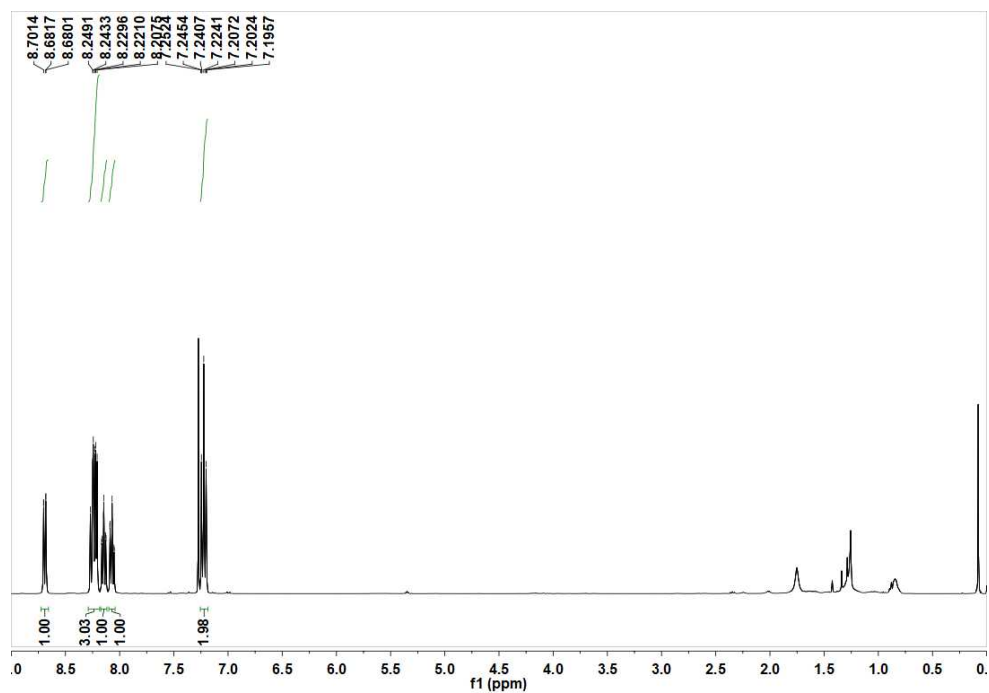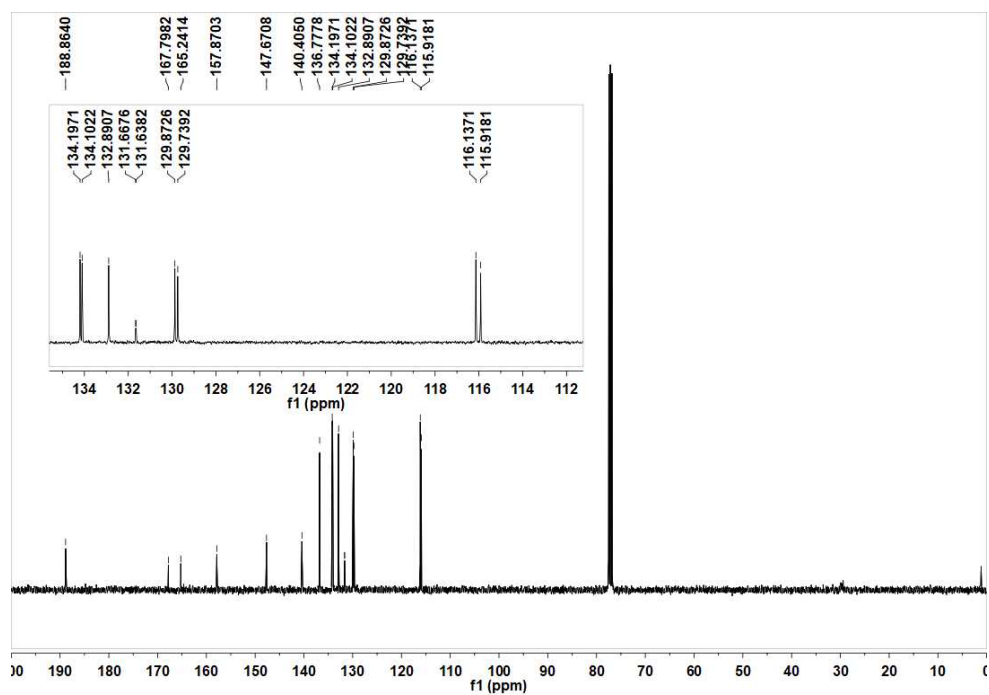

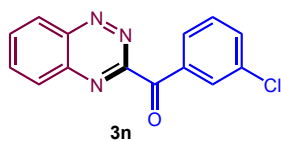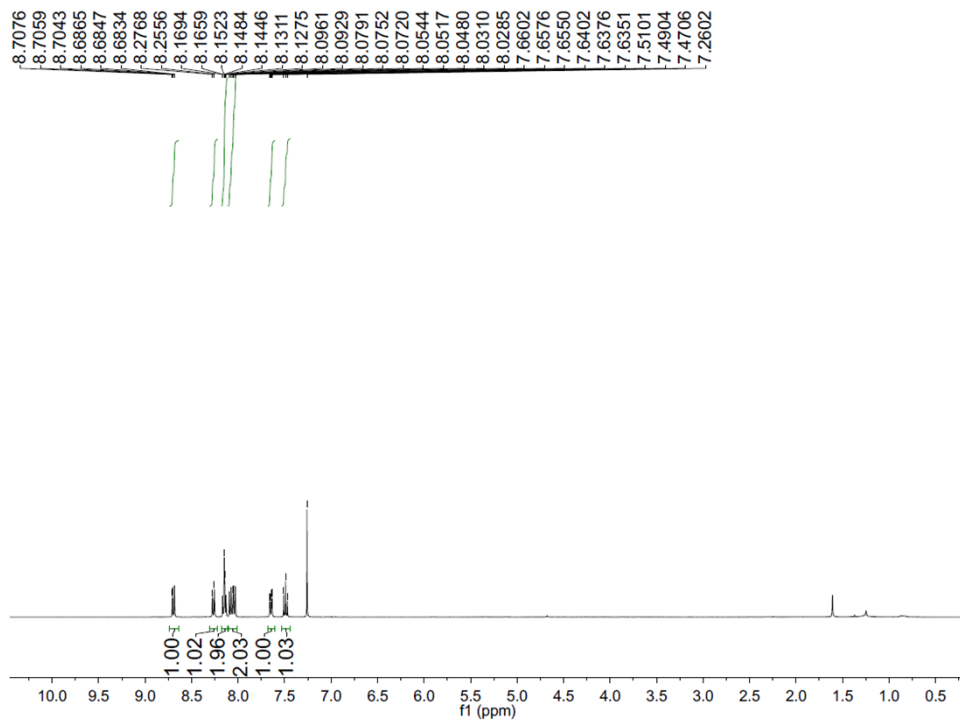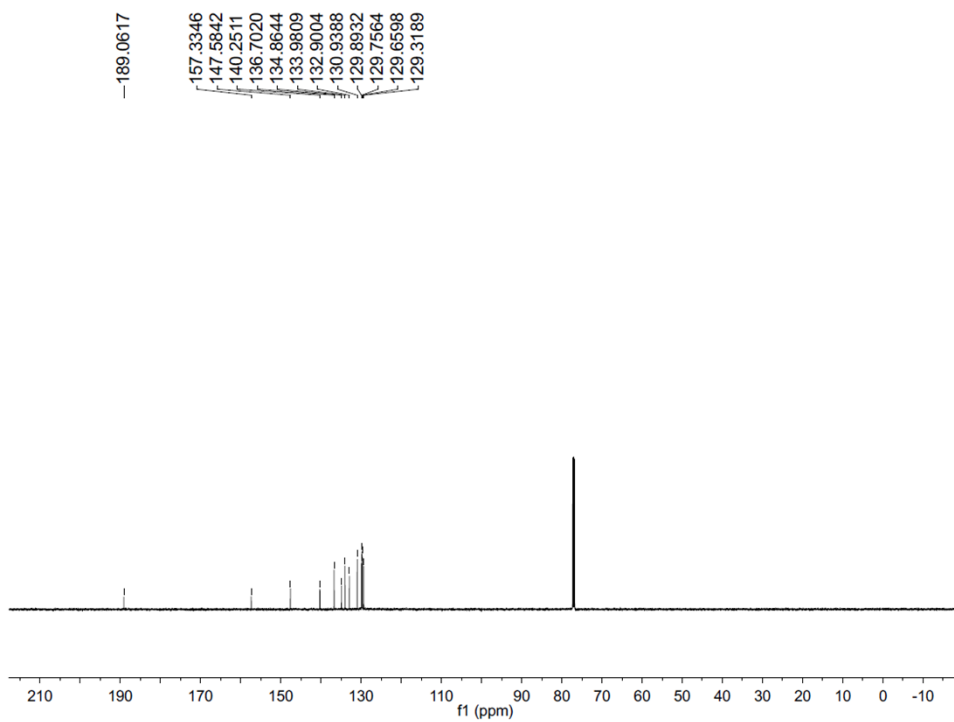

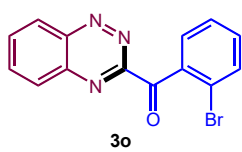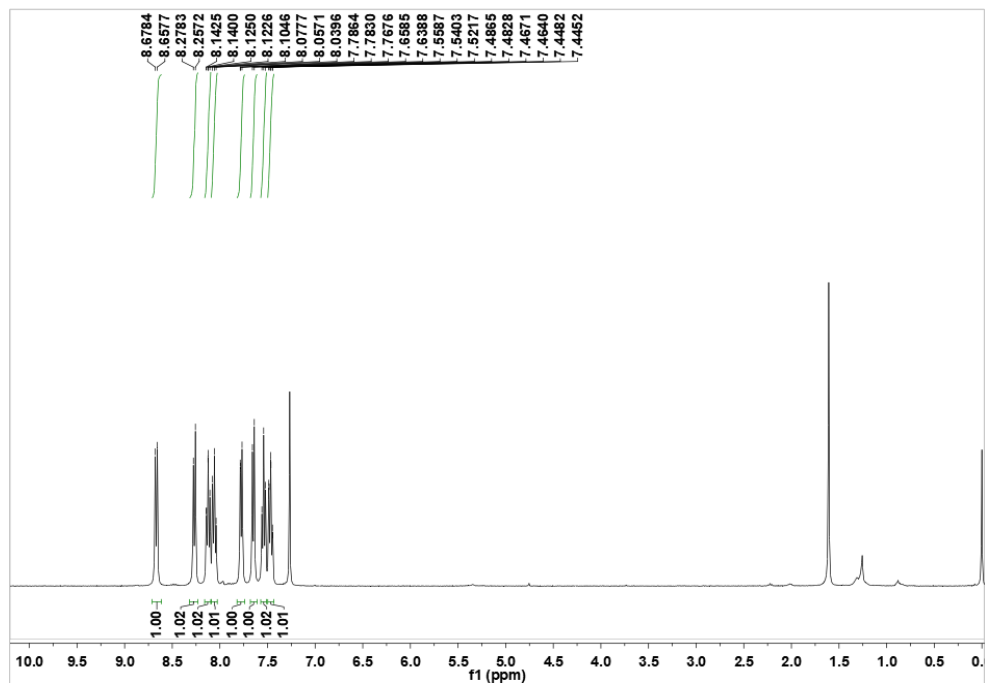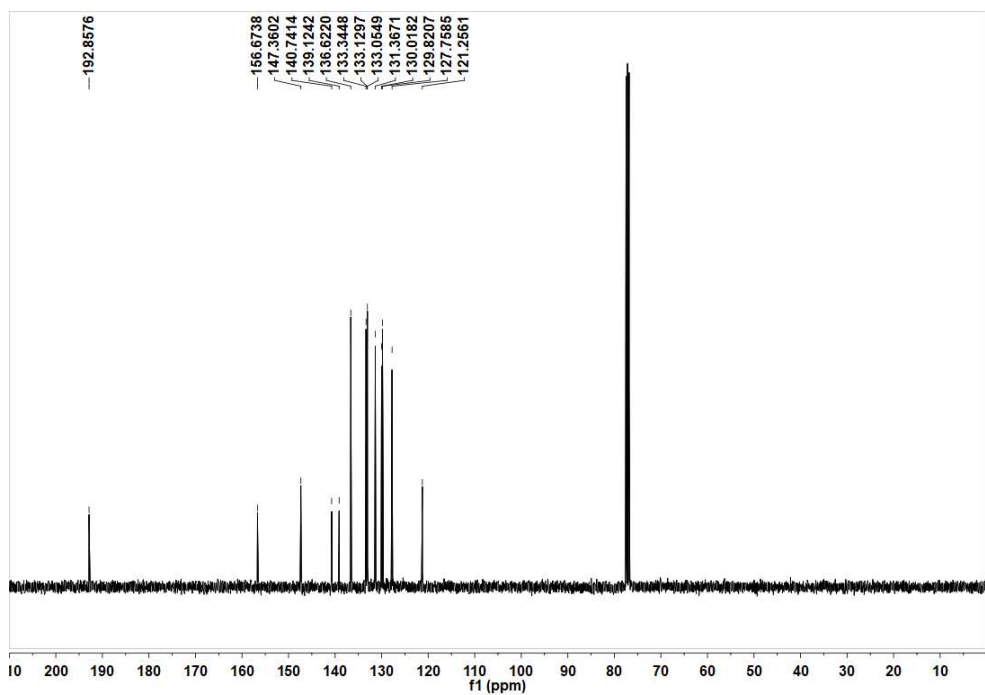

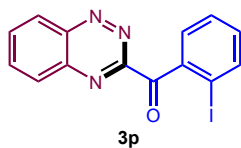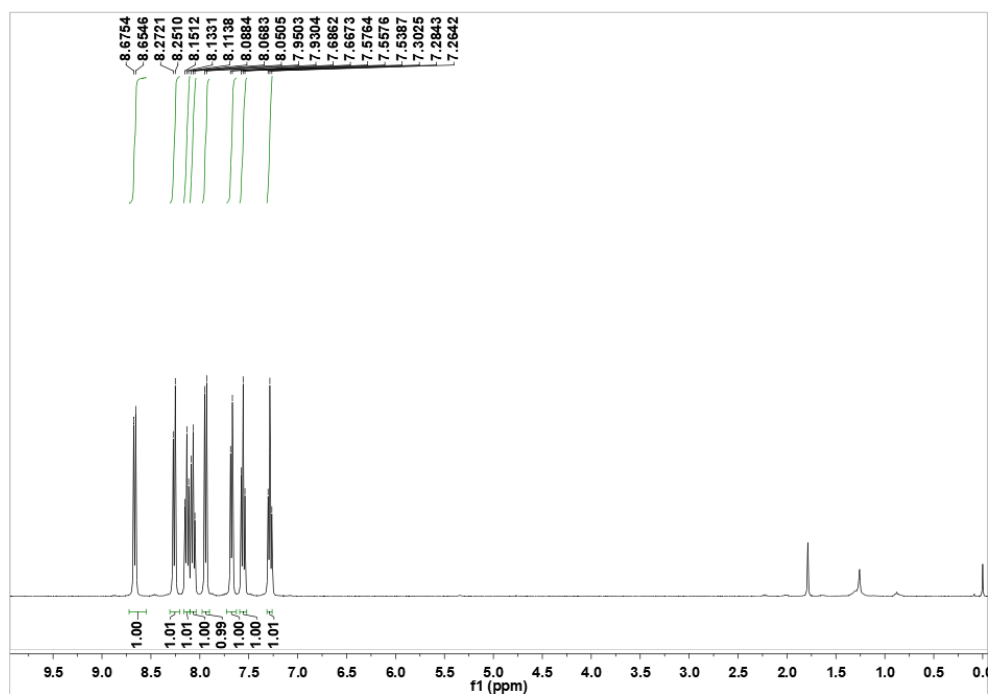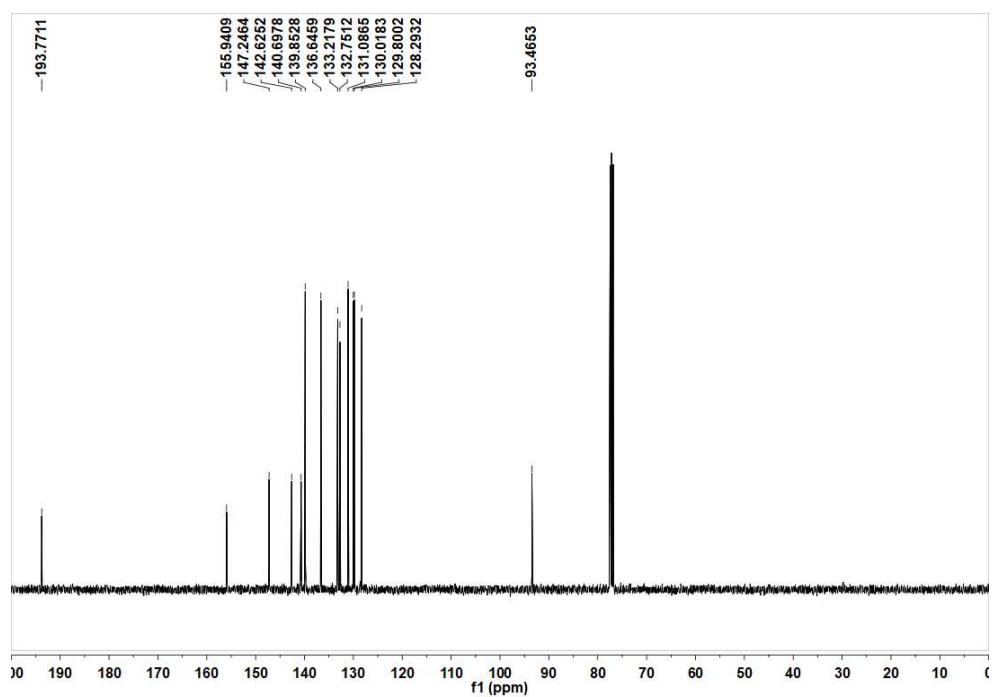

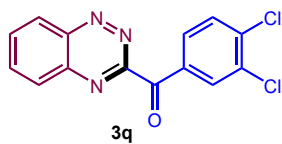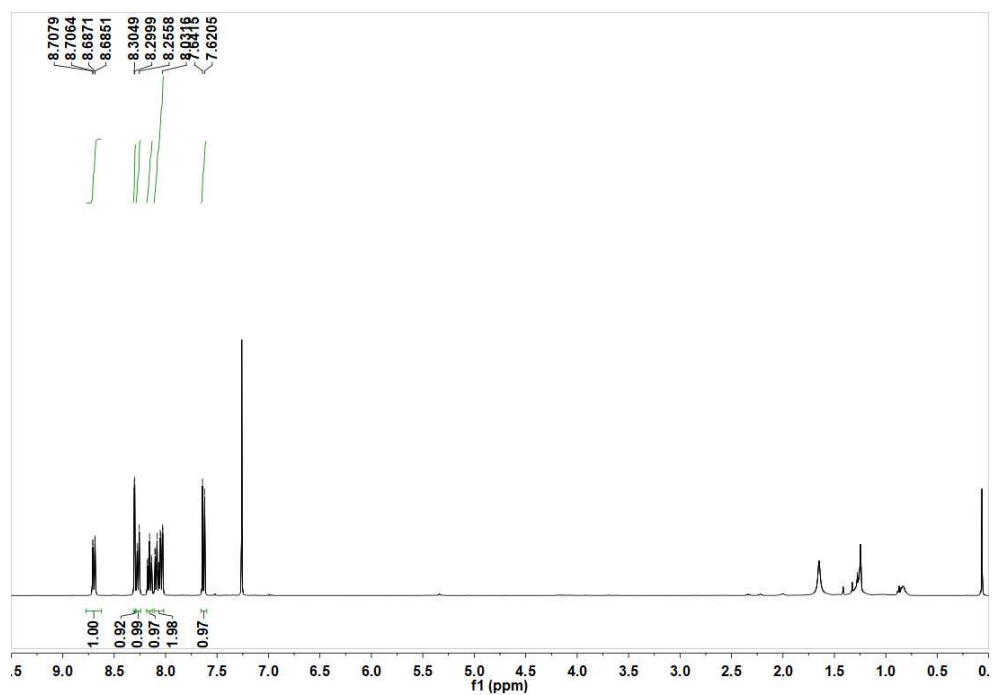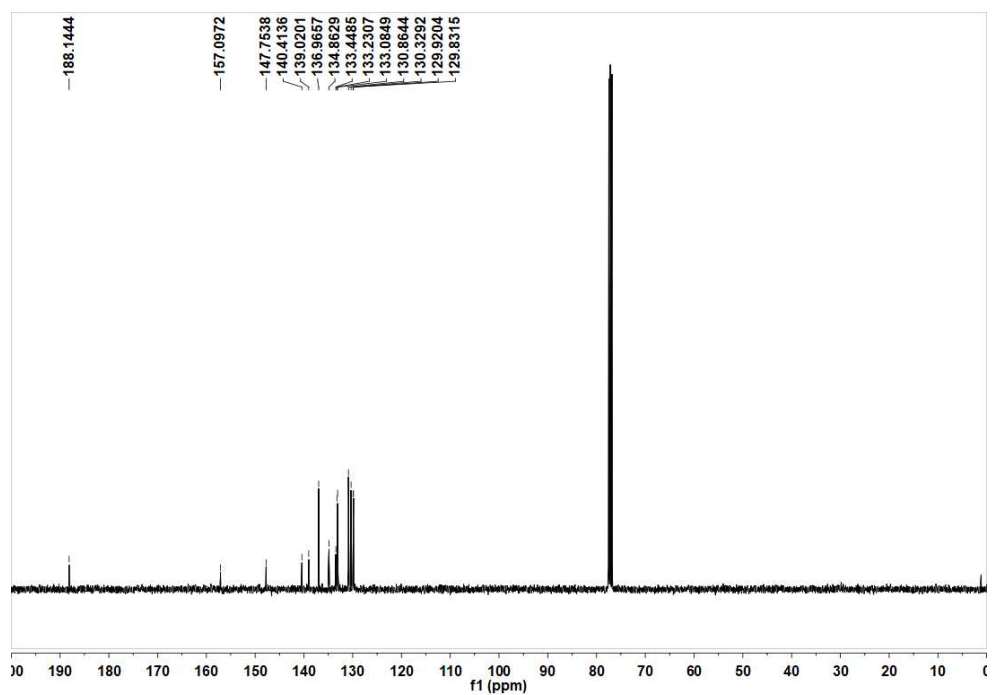

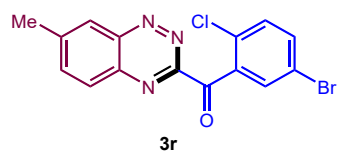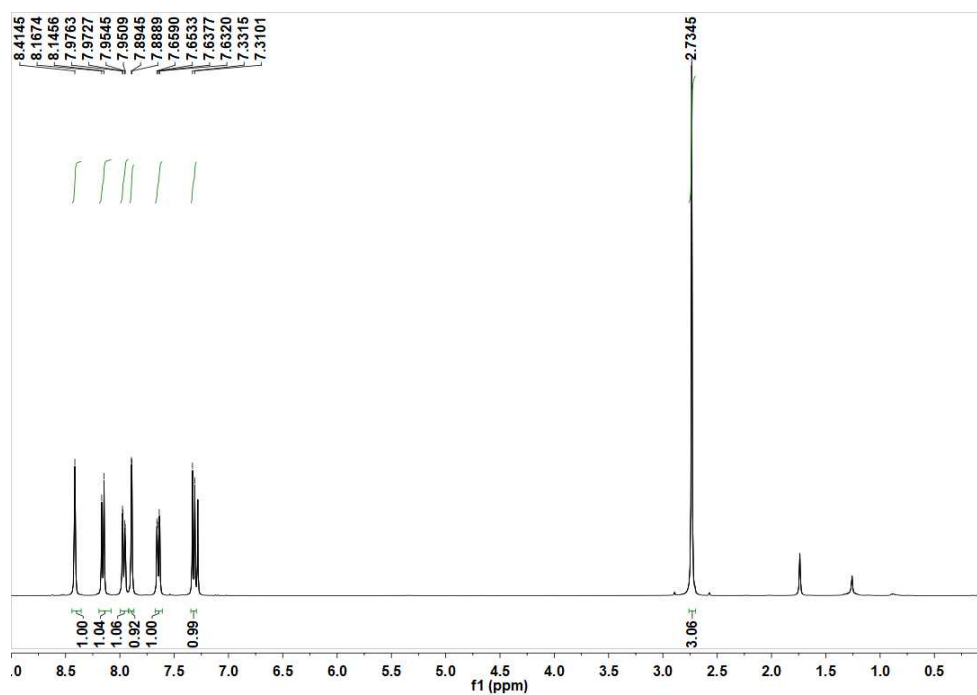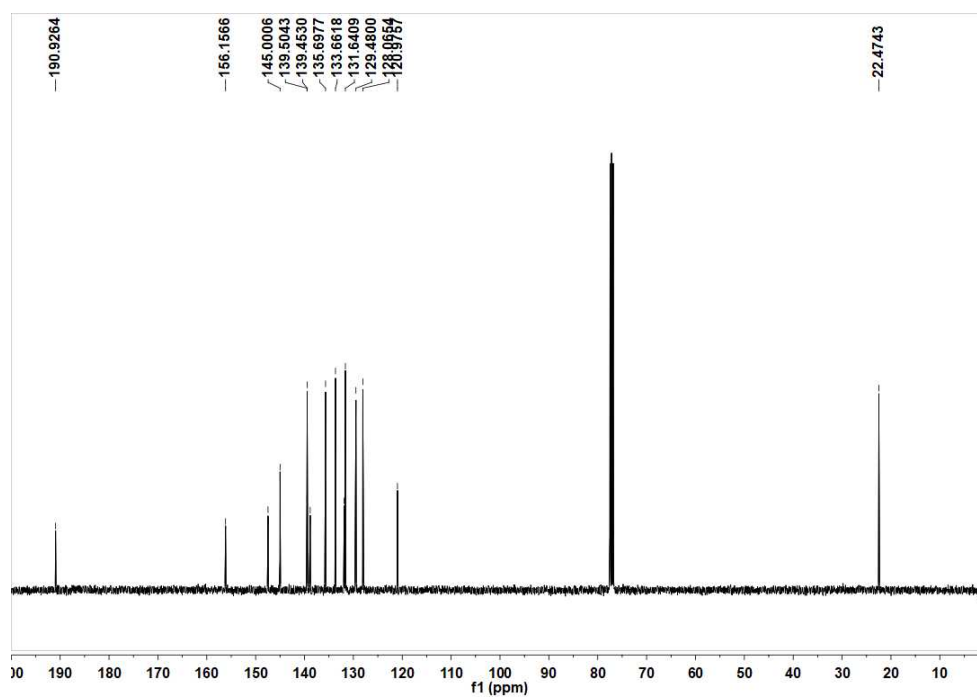

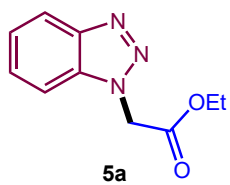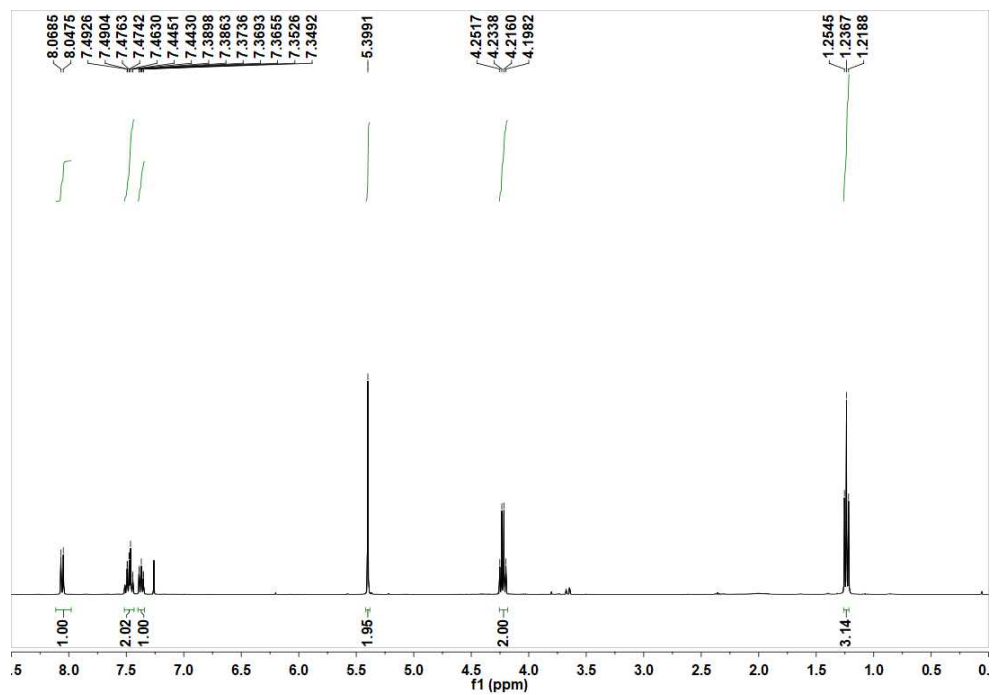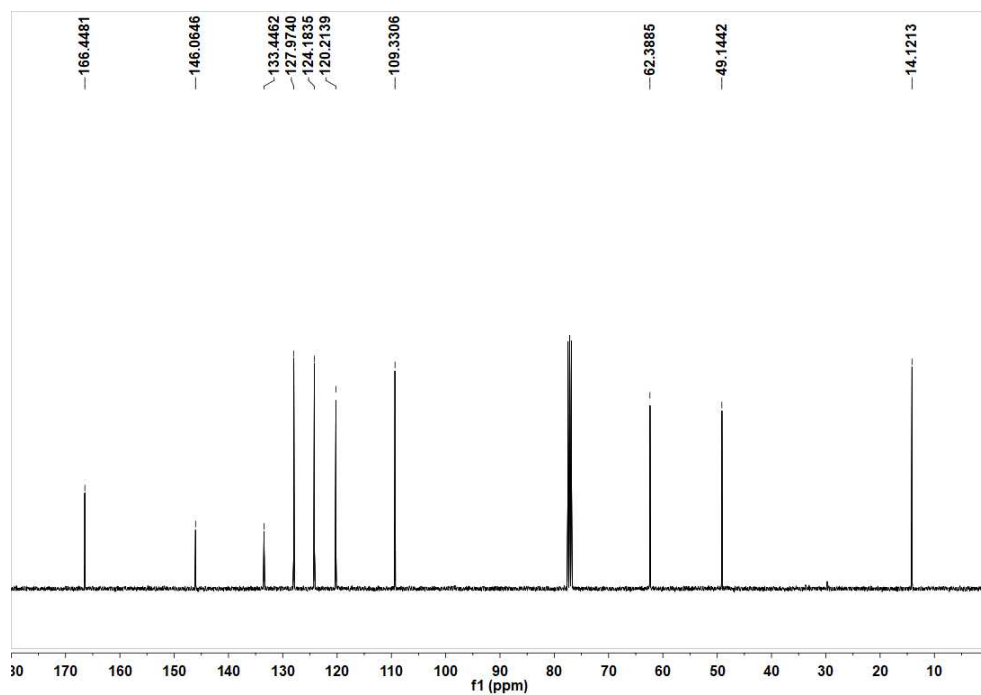

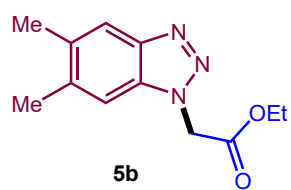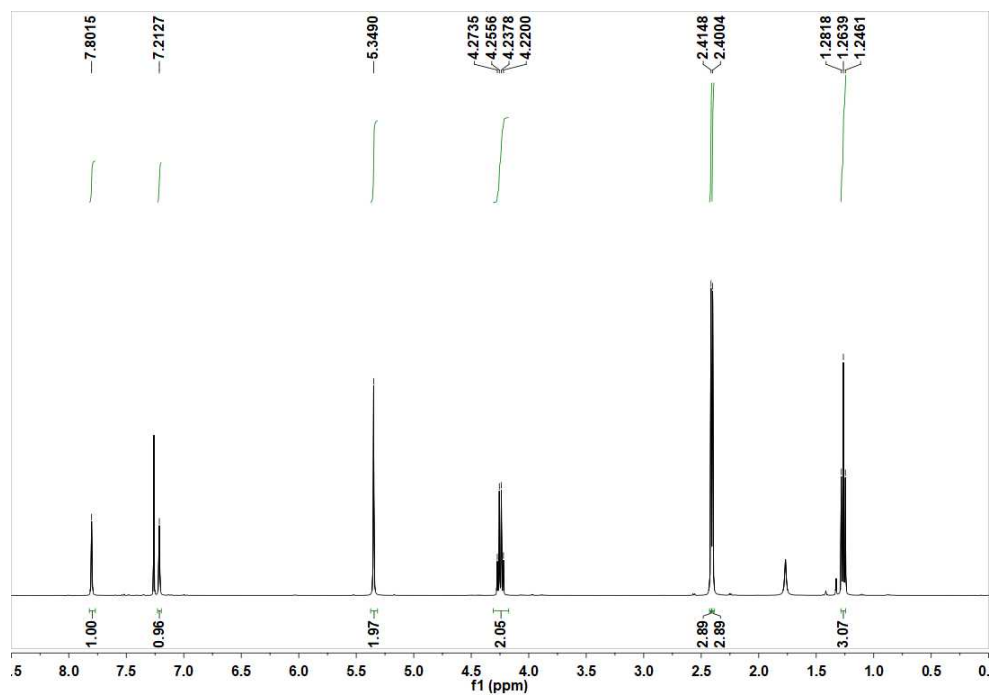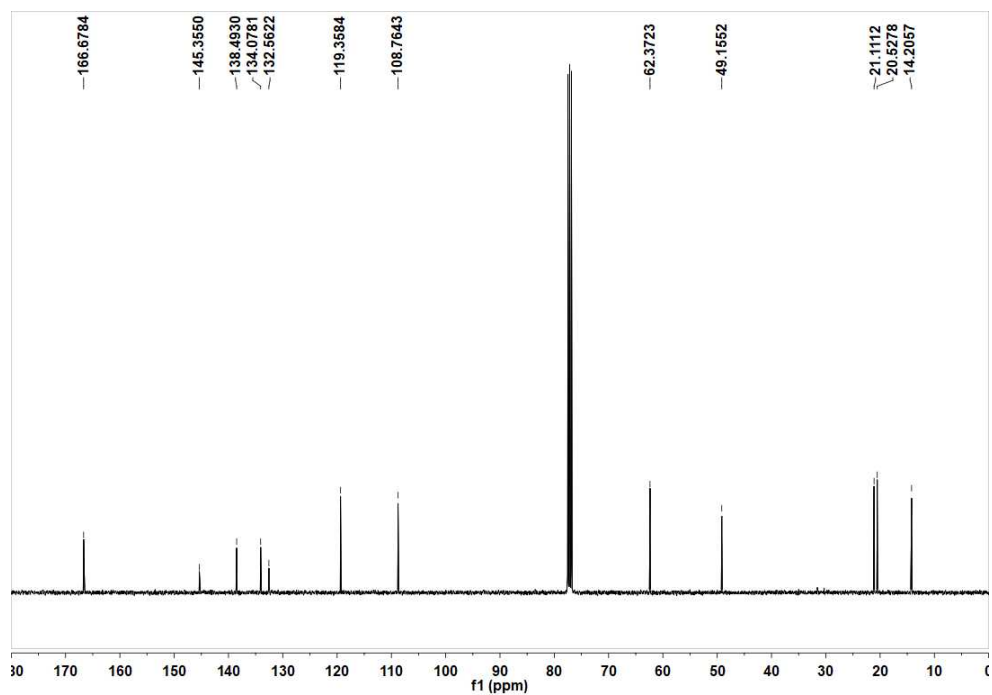

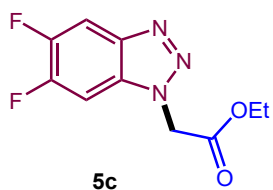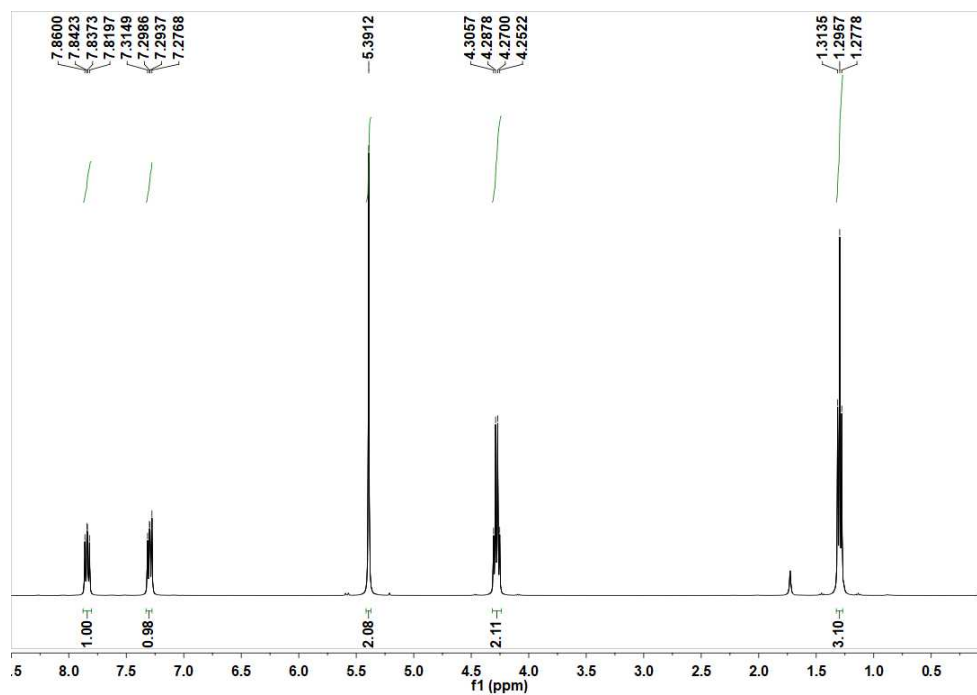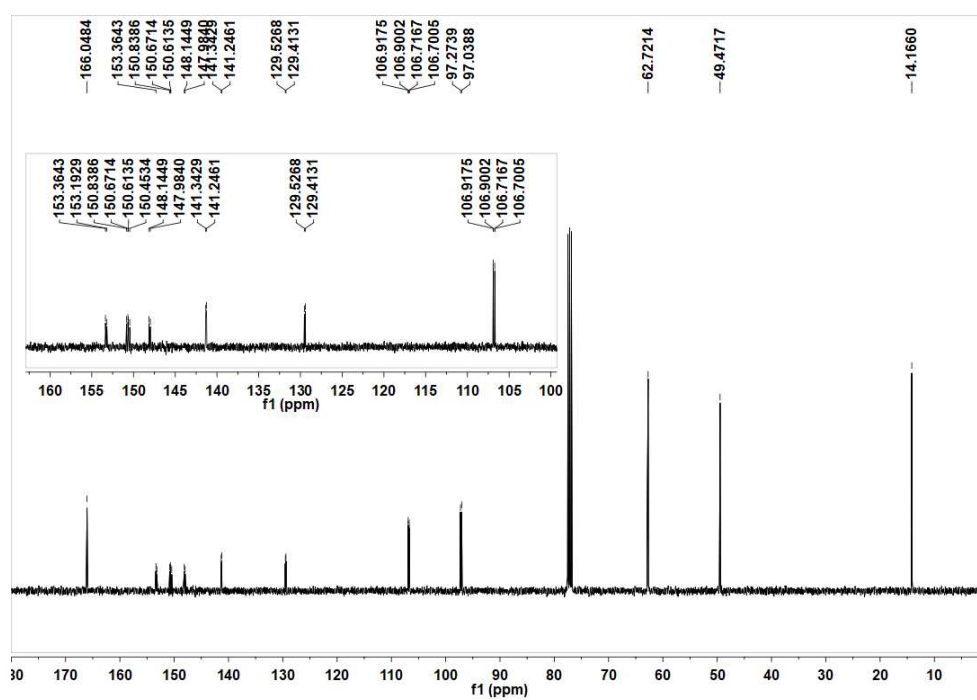

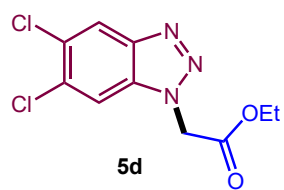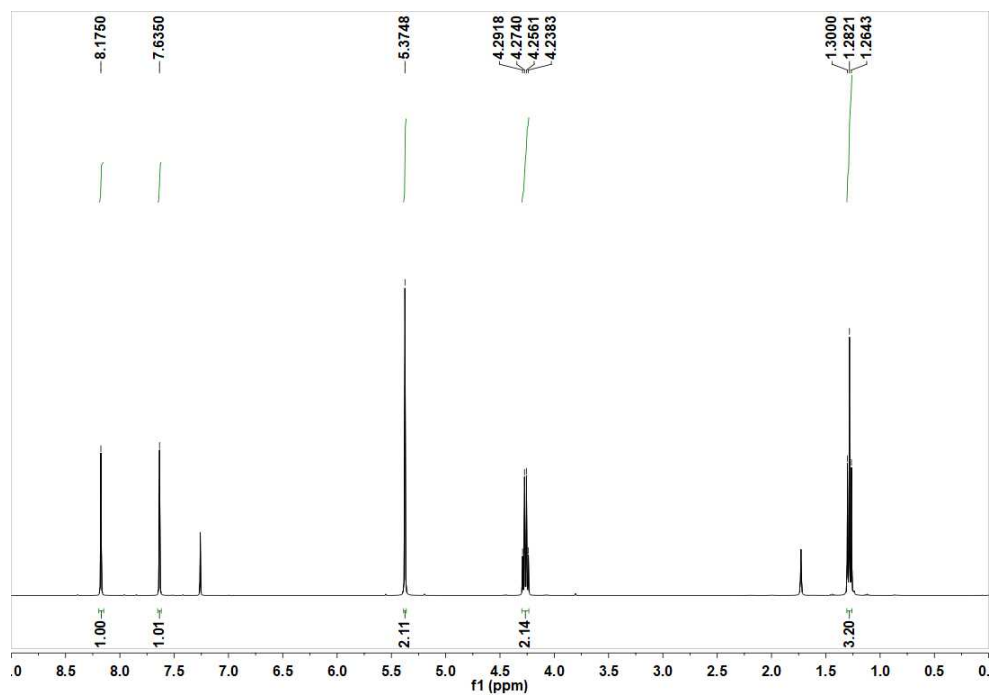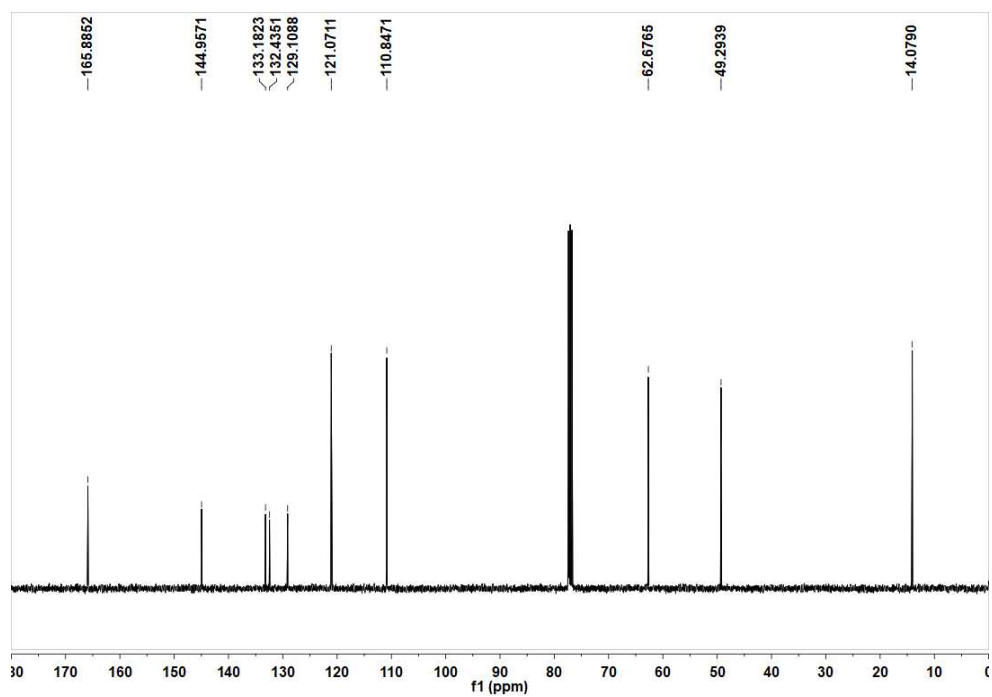

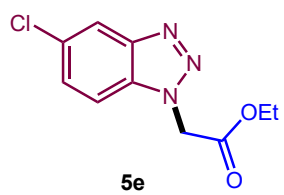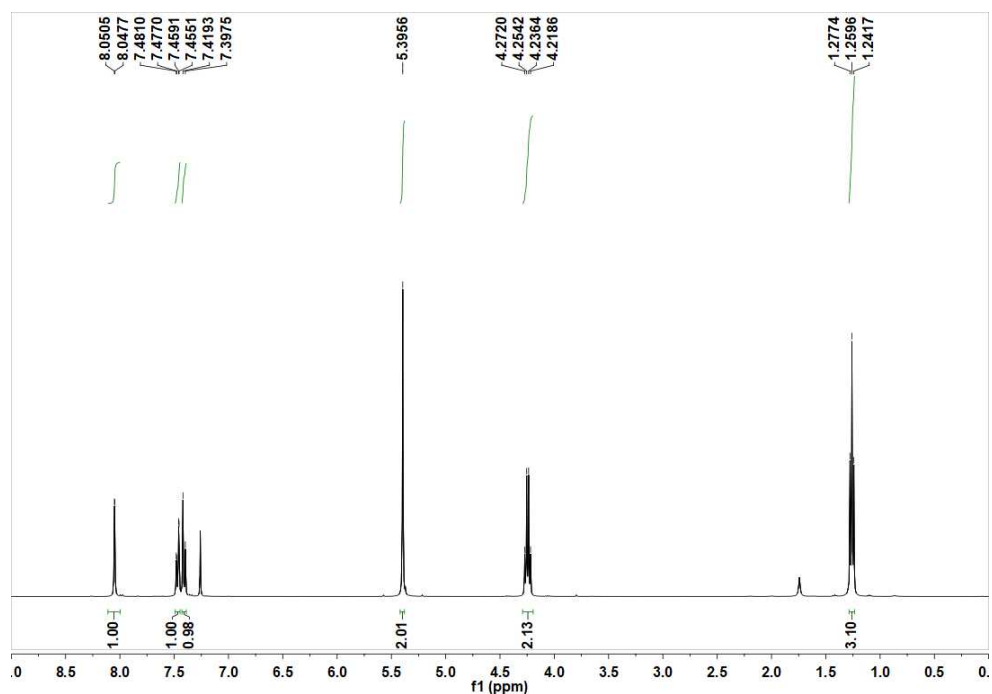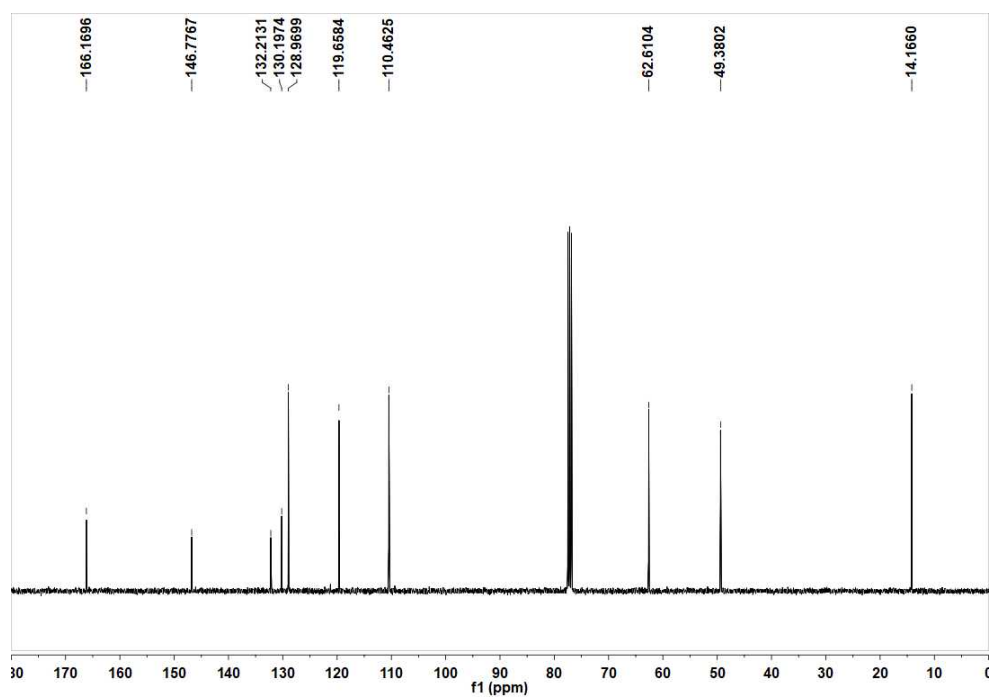

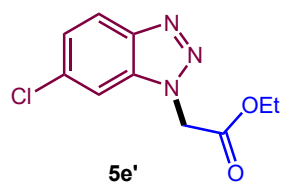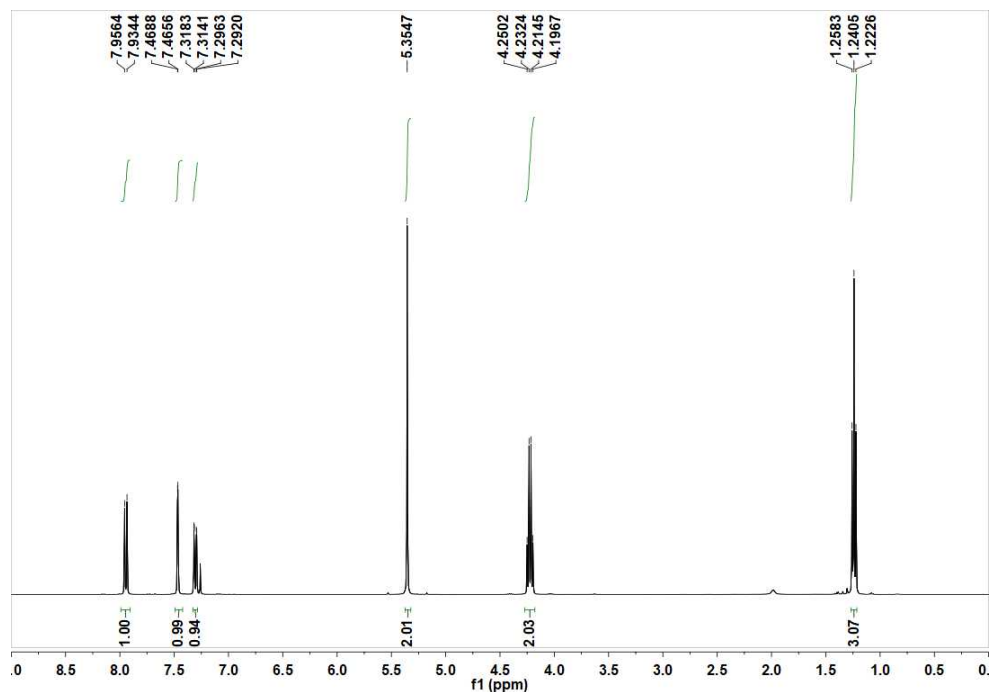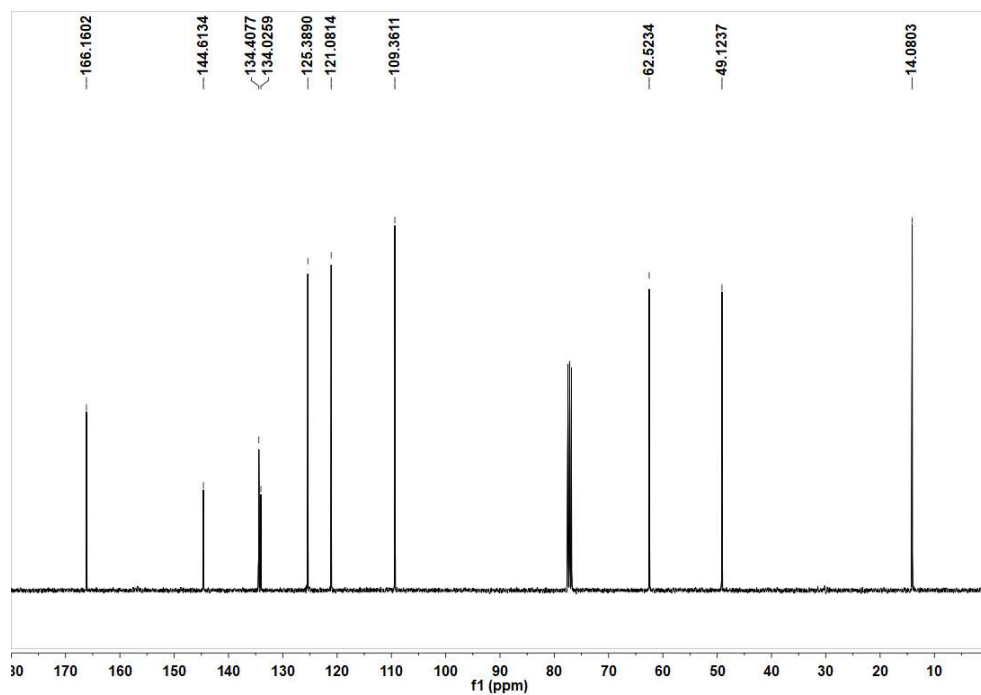

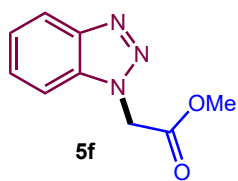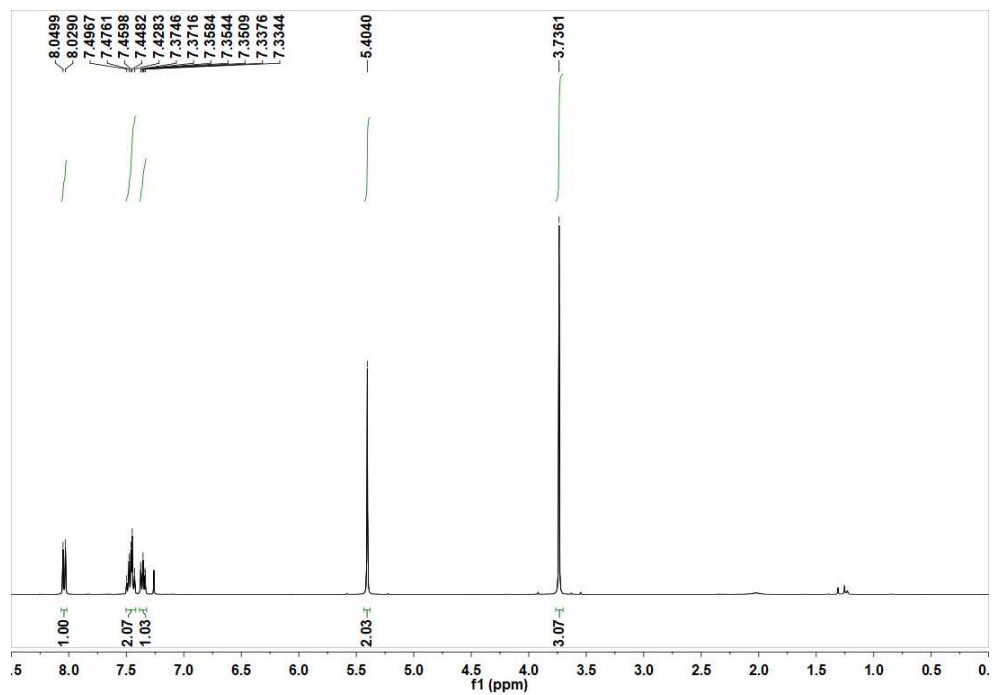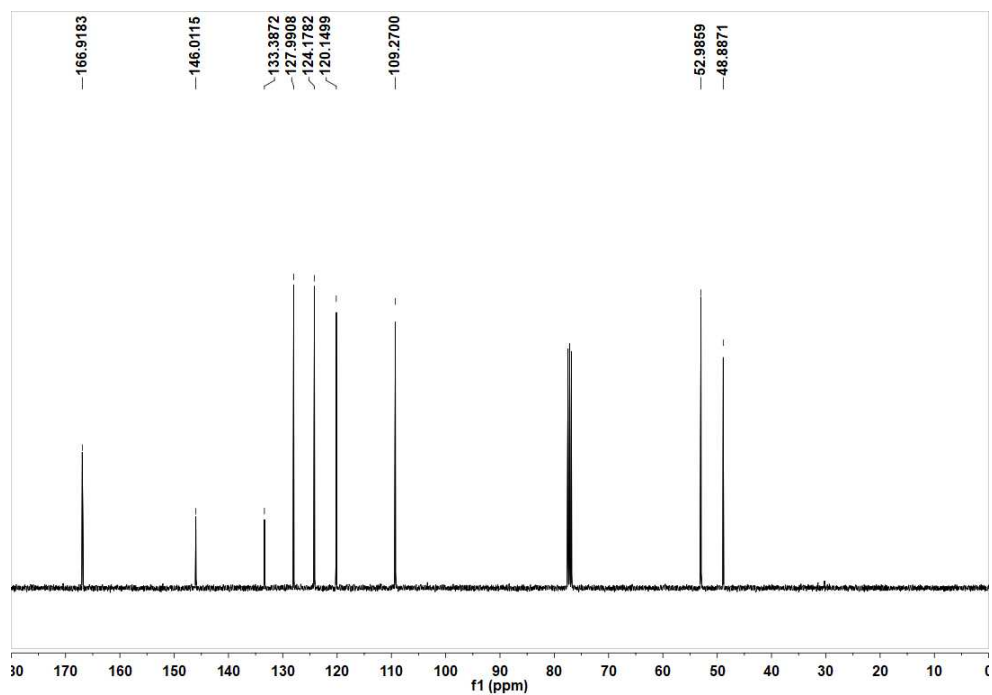

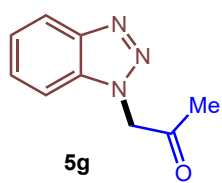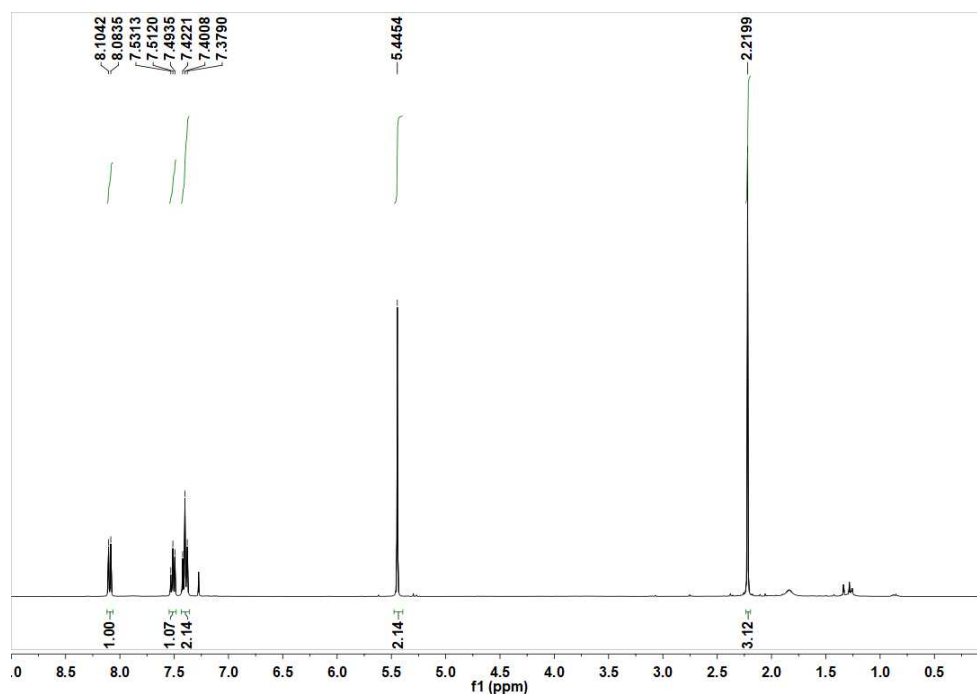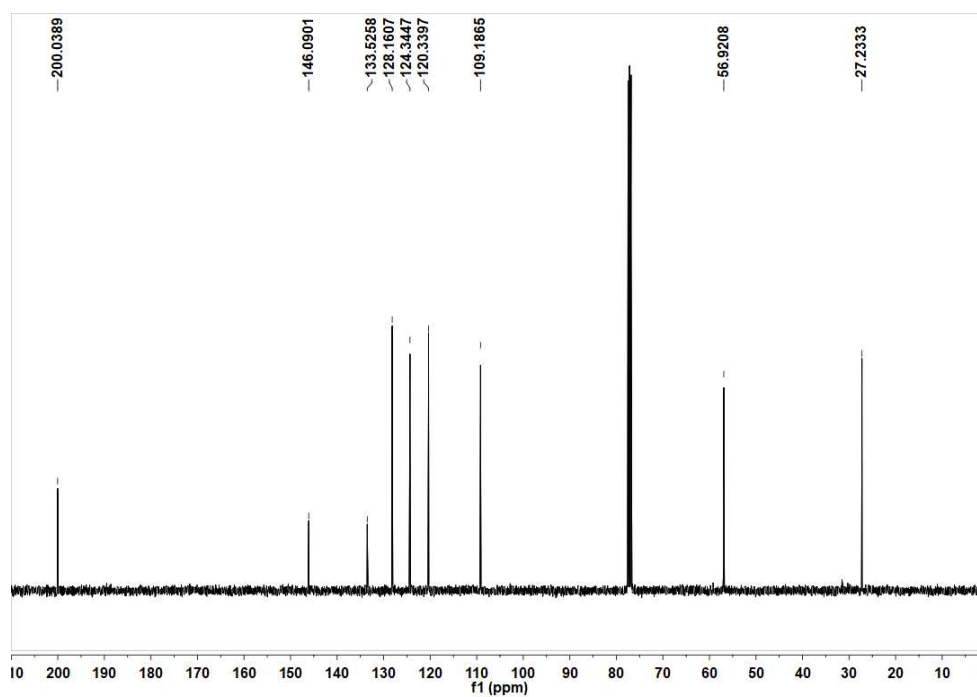

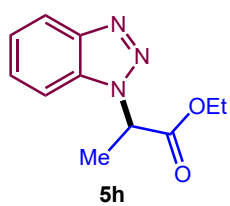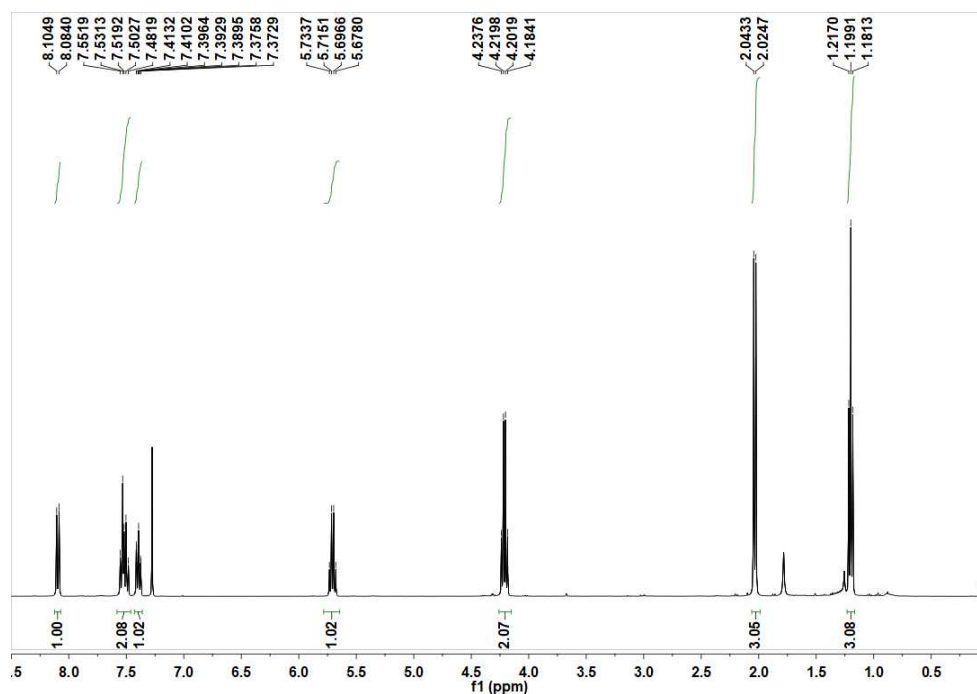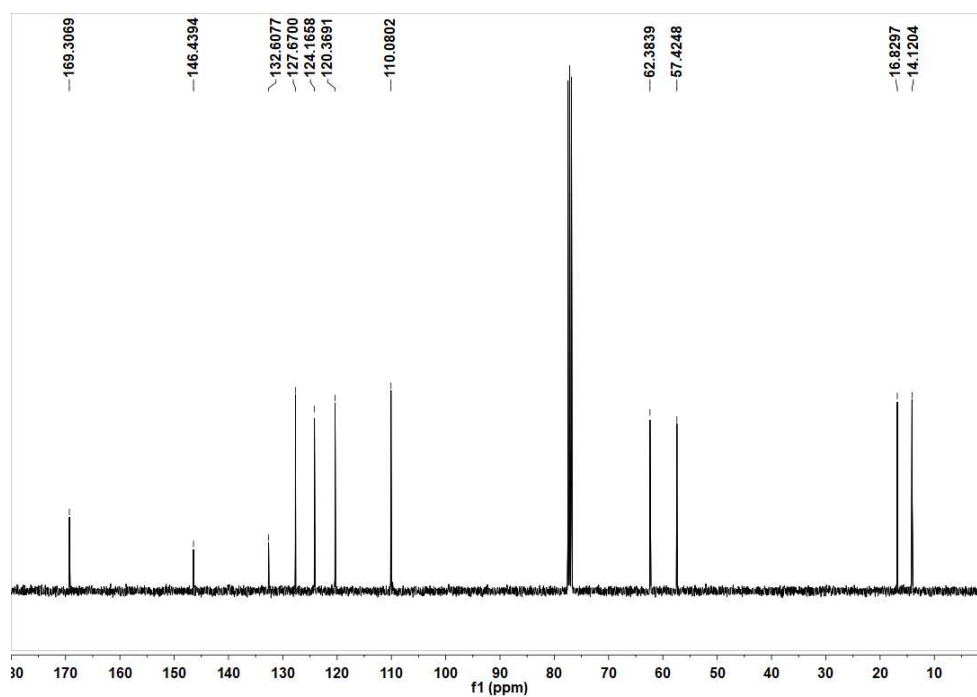

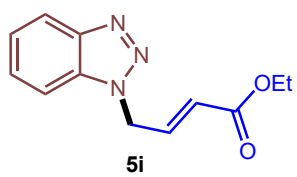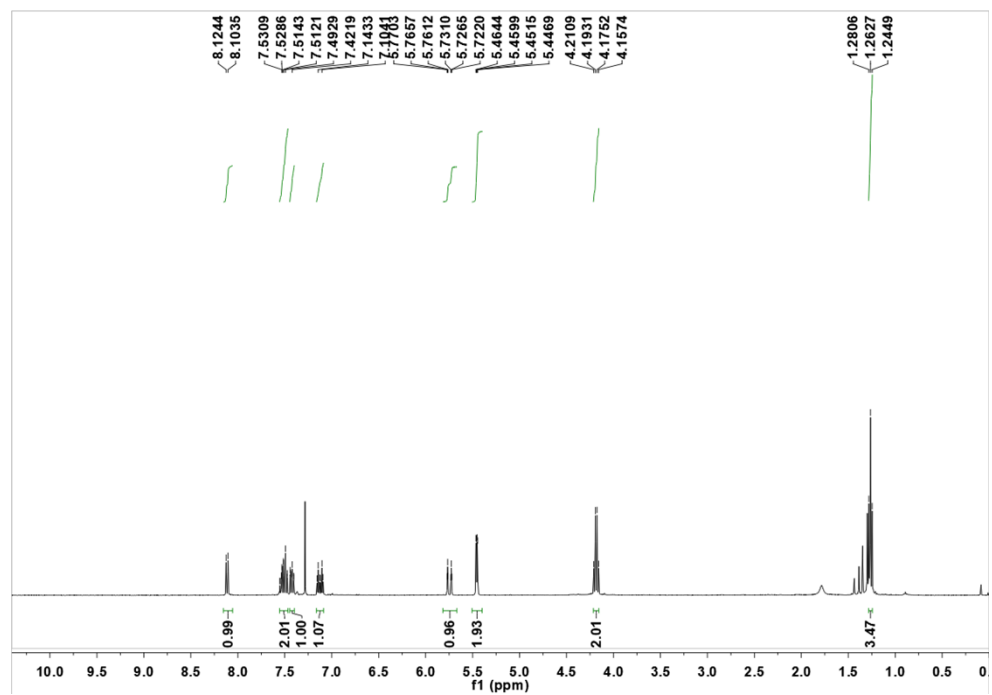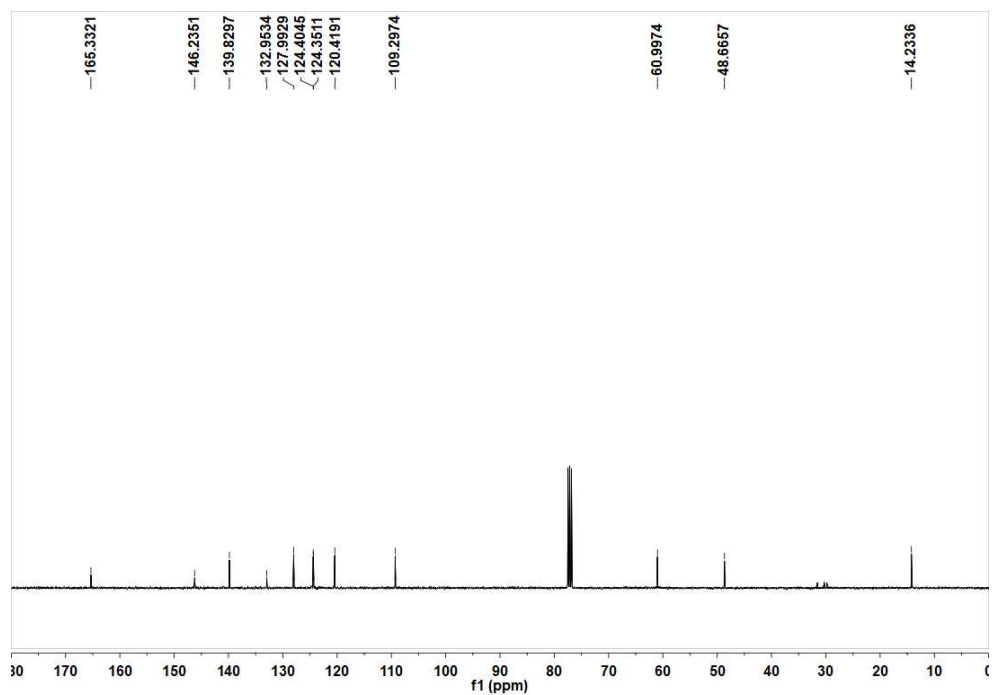

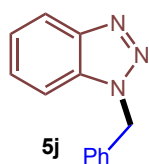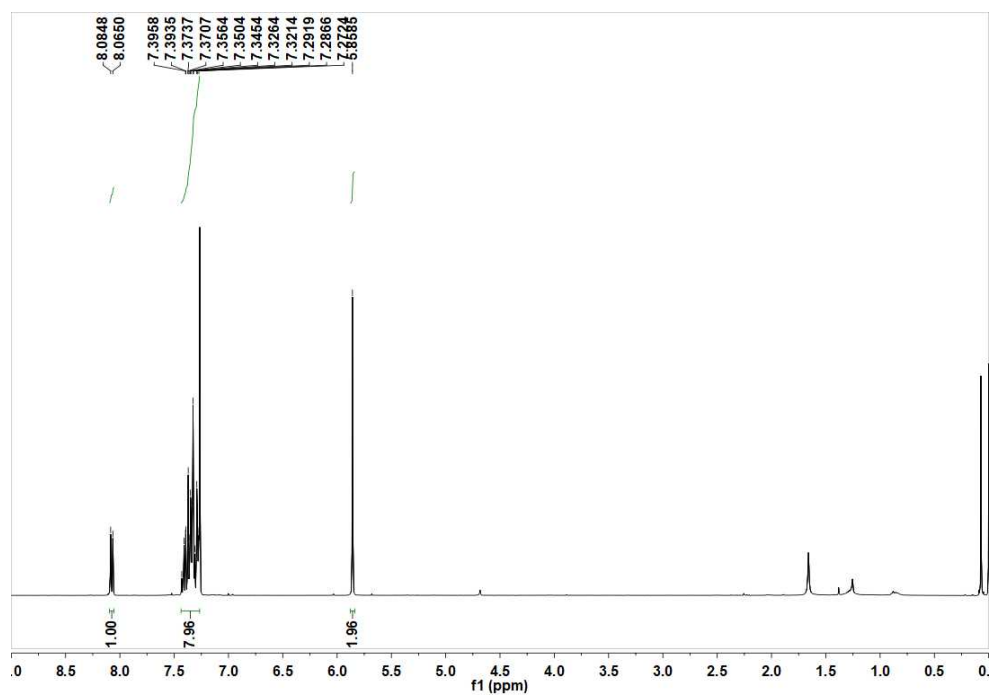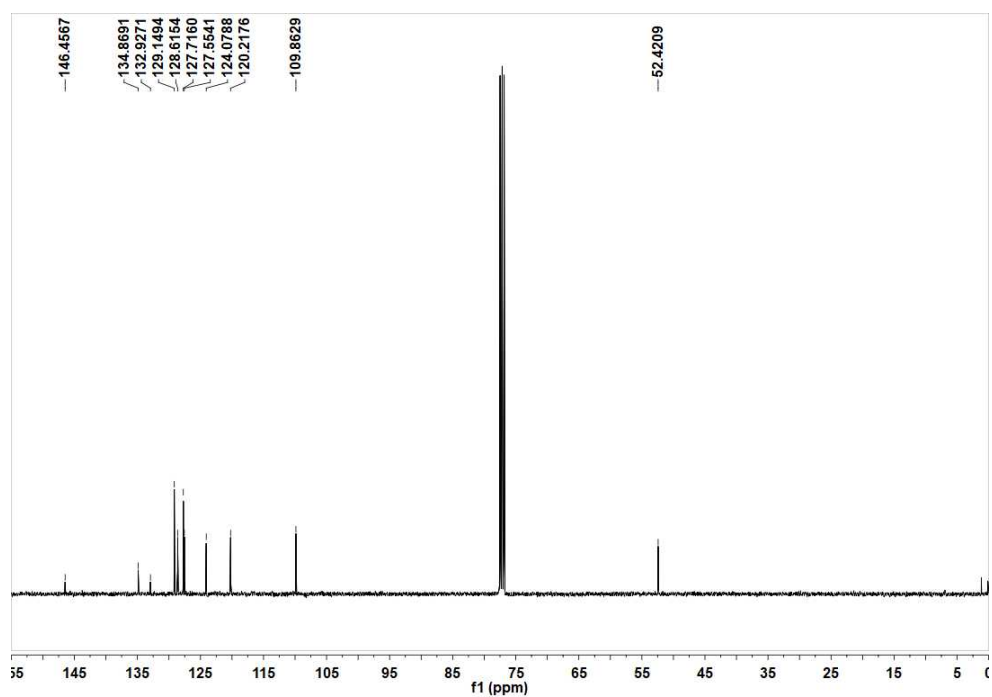

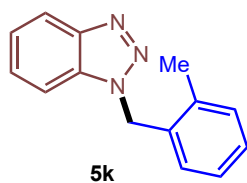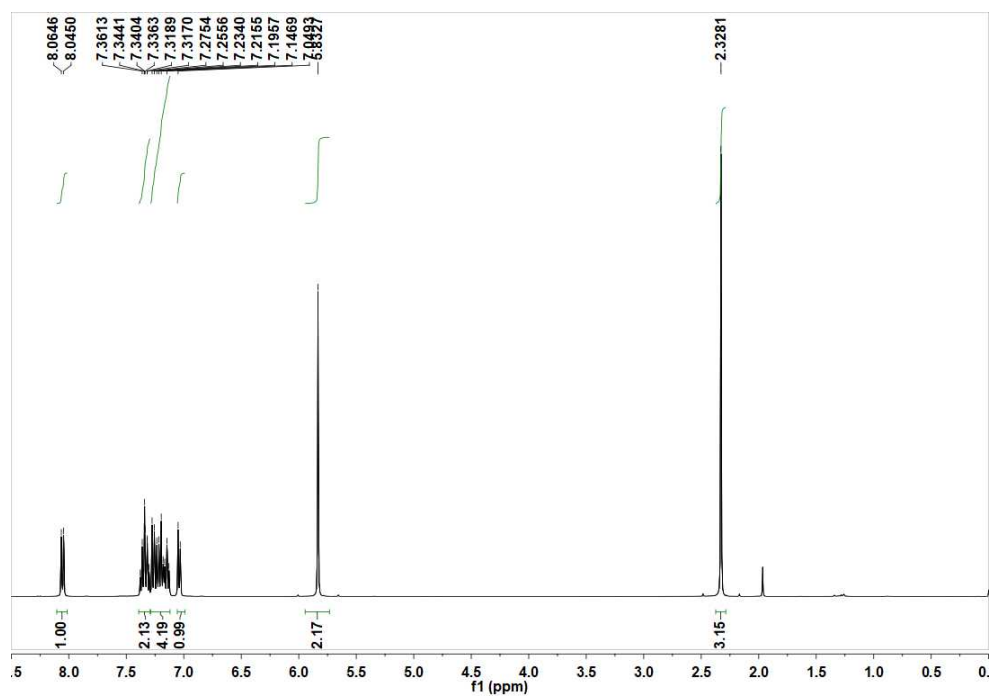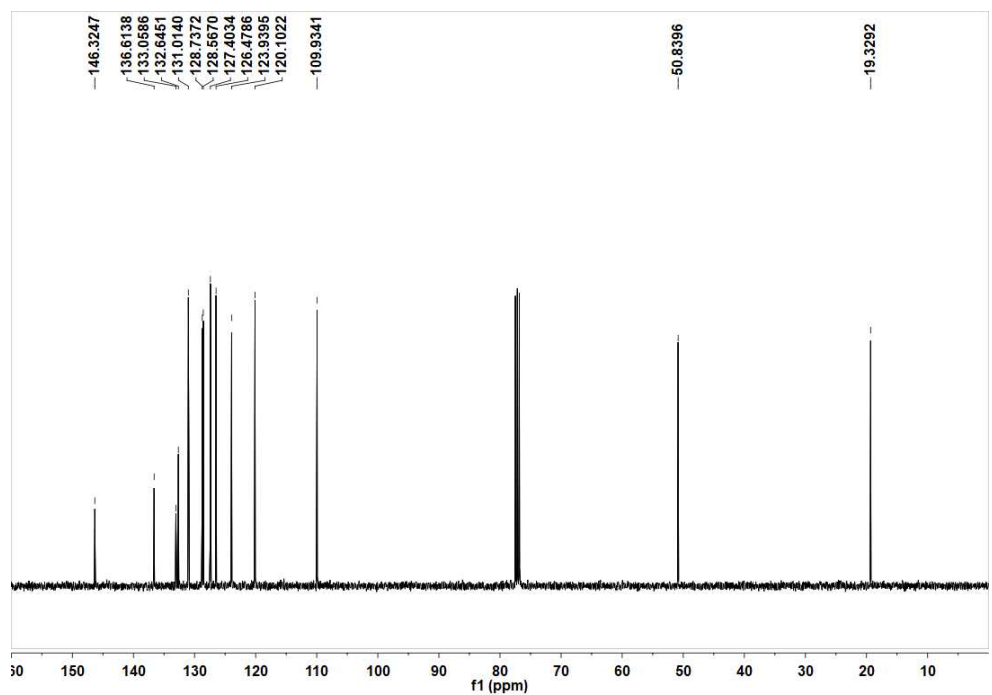

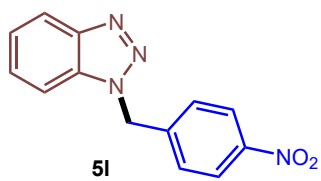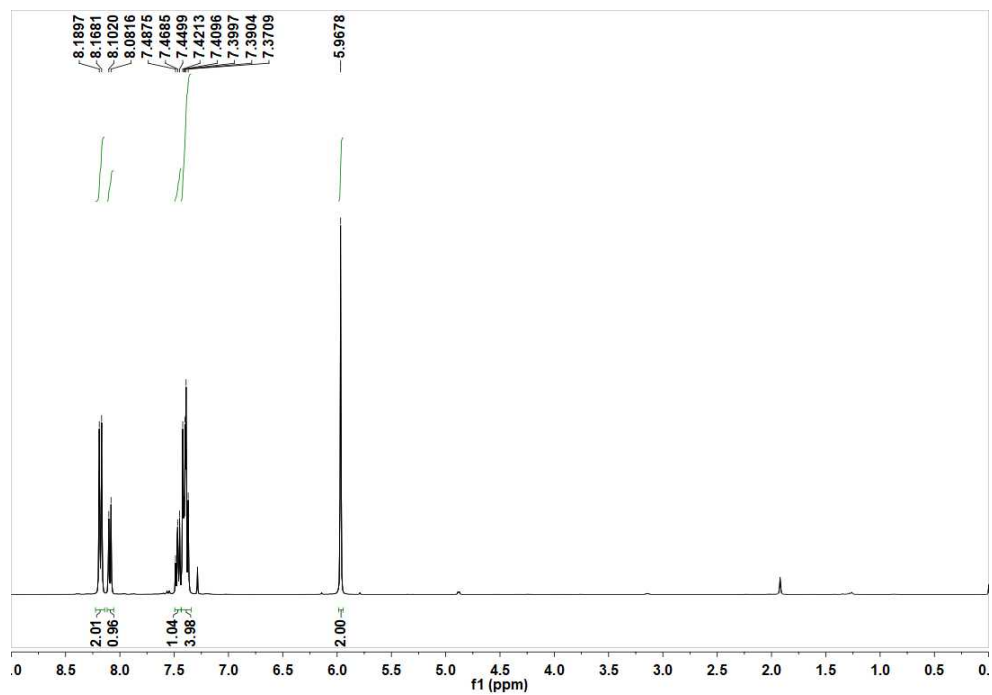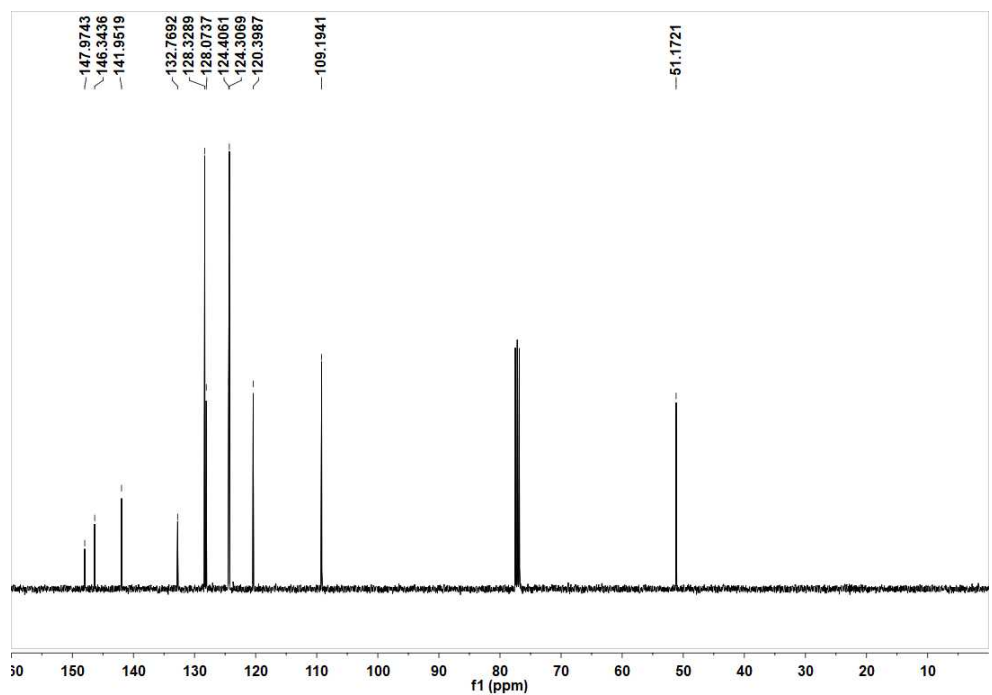

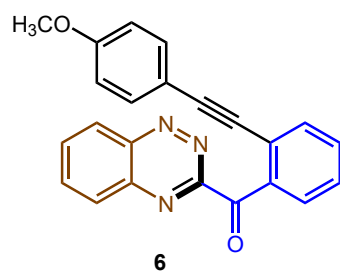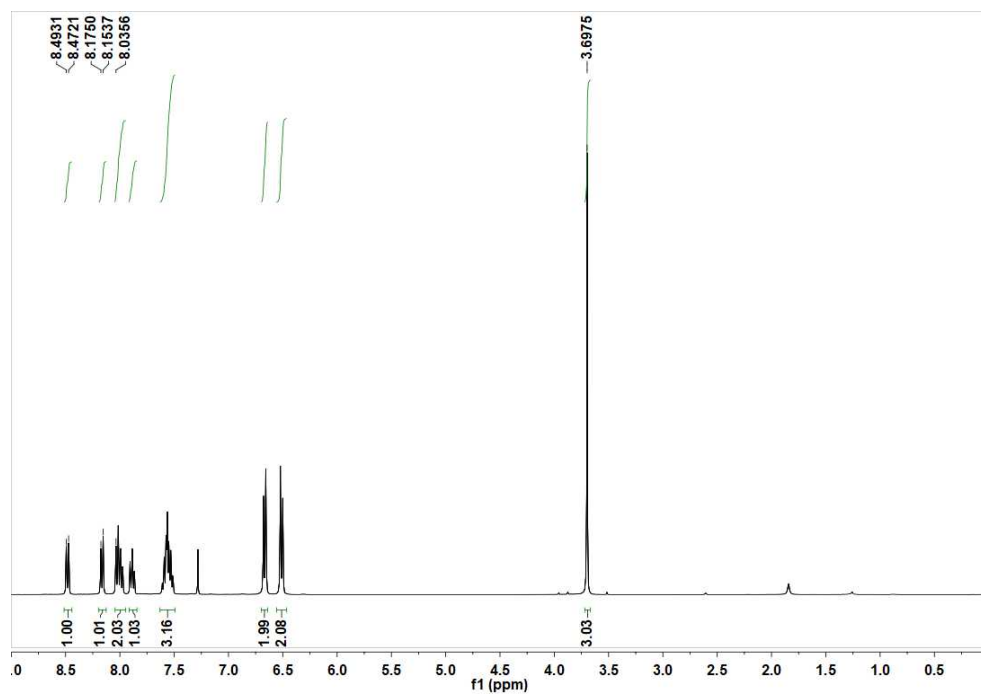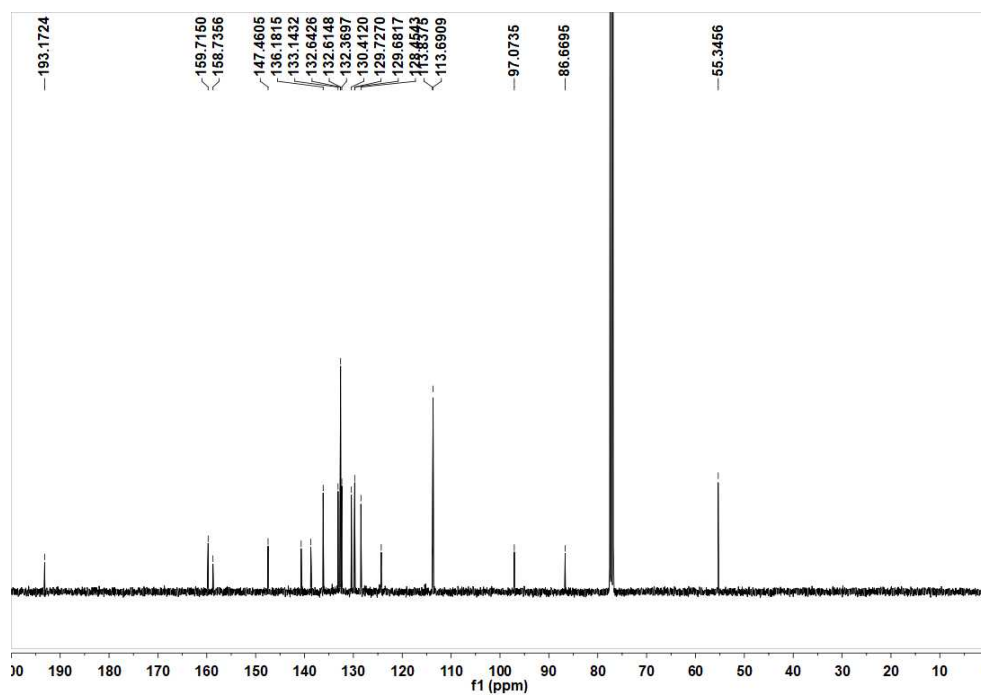

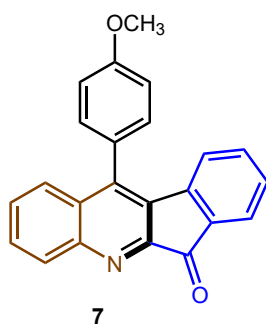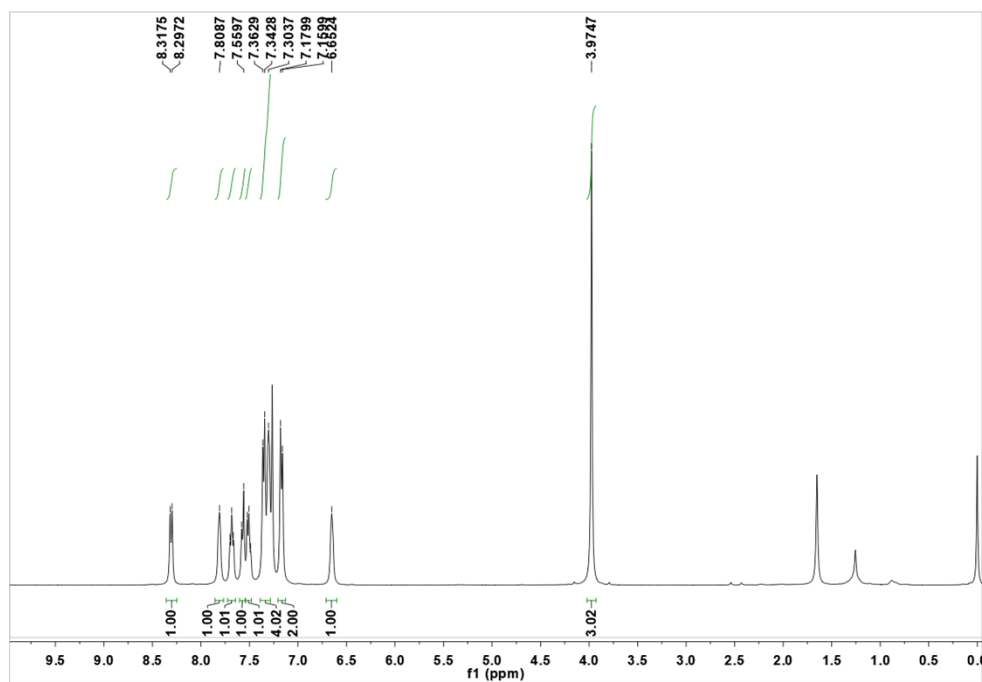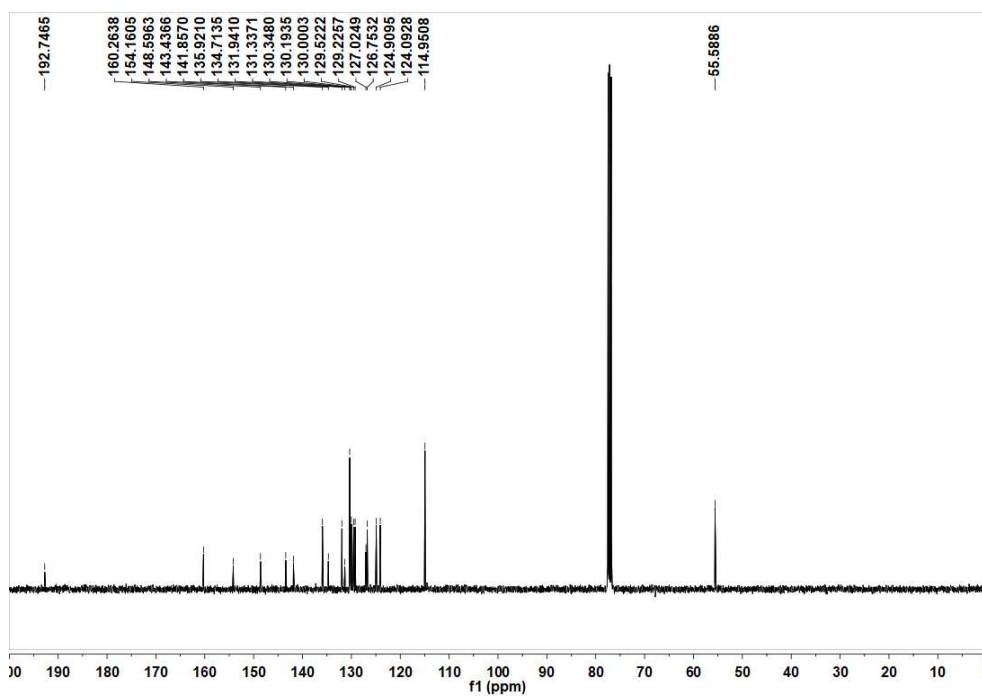

Supplement: d3qo00916e1.pdf [file d3qo00916e1.pdf]
